# Supplementary material for: An integrated analysis of lncRNA and mRNA expression profiles in the kidneys of mice with lupus nephritis
Source: PeerJ. 2021 Feb 16;9:e10668. doi: 10.7717/peerj.10668 (PMC7894116; doi:10.7717/peerj.10668)
Supplement: Supplemental Information 1 [file peerj-09-10668-s001.xlsx]

## Sheet: Sheet1
Table S1. Primers that were used for qPCR in DEGs and DELncRNAs
Gene name	Forward primers	Reverse primers
DEGs
pspc1	CTCCAGAGCCTTTCGTGC	TTTCTCCGGTTGTTTCCA
pten	ACCATAACCCACCACAGC	TTACACCAGTCCGTCCCT
MAPK14	ATACAAAGACGGGGCATC	TAGGTCCTTTTGGCGTGA
Tgfbr1	GGAGAAGAAGTTGCTGTGAA	TGTCTGCTGCTATAAATCCC
Riok3	TGGCTTTCAGGTAGGGGATG	TTCTCGTGTAGACGGGCACT
Sltm	ATTCCCAGGAGTTGCTTTCTA	TGACTTTCGATGTCCTCTTTT
Tia1	GTGTAATCGCTGCCAAAGAAGA	TTCGCTACCTCCCAAATCCT
hnrnph3	CTGAACTATTTCCTCTTTGCTG	AGTATTGAAATGGATTGGGTTA
Ube2d3	CGCCGGGATAATCAAGAA	CGCCGGGATAATCAAGAA
Ubr3	AGCTTAGTAGCAGAGCGTAG	ACCAGGAGCTGACCATTTAC
Ube2d2a	AGCTTAGTAGCAGAGCGTAG	ACCAGGAGCTGACCATTTAC
Dip2c	GTCTTTACCTGGACAAACCTG	CCACGACCACTACTCCTACA
Hmgb2	GTCTGCCTTCTTCCTGTTTT	TTCTGCTCATACGGTTGTTT
H2-Aa	CTGGTCTCATAAACACCGTCTG	GCCCAACACCCTCATCTGCT
Ppp1r9a	CCCTTCGTATGCTAAGTTCA	CATCCTGTGGTTCAGTCCCT
Hes6	GGTCCTCATCCTCCTGGC	CACCTCGCTGAGTAGTTTGC
DElncRNAs
GM26601	TGGCTGGCTTTCAGTGTT	CAGGGTTTCTCCGTGTAG
2B13Rik	CCTCCAGTATTTTCATAGCAA	GGTTCAGTCCATTATCATCAA
GM20513	TCTAGGCTGGGTTAATGGT	ACTGAGTGGGAATAGGGAC
N18Rik	AGTTGAAGGTAGGCACGAT	CACCTTAGCTGCTGTATTCA
Neat1	TGTCCTACACCTTACGCAATC	TTCTGGGAGCATCATTCTTT
RP24-230J14.4	CTATGTCATTCATCTGGCAGTC	GCTTCCCTCACTAAGTCTCC
Lincpint	TGAGGCTGAACACTACACCG	CACCAACCATCATGGGAAA
Gm26944	TGATTAAGAAGCTAAGGAAAAG	GAAATCCTATGTGGTCCAAT
Ftx	AGTCCCTGTACTCCTTTCCA	ATCTCAGTCCTCCAGCCTTT
Gm26556	CTTCCTGACCTGGGCCATAA	GACCCATATCTACTCAGTCTCCA
