# Supplementary material for: An integrated analysis of lncRNA and mRNA expression profiles in the kidneys of mice with lupus nephritis
Source: PeerJ. 2021 Feb 16;9:e10668. doi: 10.7717/peerj.10668 (PMC7894116; doi:10.7717/peerj.10668)
Supplement: Supplemental Information 2 [file peerj-09-10668-s002.xlsx]

## Sheet: Table S2
Table S2. Summary of sample names, description, the RNA-seq sequencing information and mapping results in each sample
SampleID	raw_total	clean_total	ratio_total	raw_base	clean_base	ratio_base	uniqtag	Q20	Q30	GC	DUP
MRL/lpr_1	79603564	78425257	0.9852	11.941G	11.184G	0.9366	43033544(54.87%)	98.83	96.64	0.51	0.6751
MRL/lpr_2	84804516	83544666	0.9851	12.721G	11.874G	0.9334	45652065(54.64%)	98.81	96.61	0.51	0.6824
MRL/lpr_3	81618584	80397721	0.985	12.243G	11.405G	0.9316	43138649(53.66%)	98.81	96.59	0.52	0.6876
Control_1	80205614	79186244	0.9873	12.031G	11.192G	0.9303	35067400(44.28%)	98.88	96.67	0.53	0.7996
Control_2	83487860	82356129	0.9864	12.523G	11.843G	0.9457	37815625(45.92%)	98.83	96.54	0.54	0.7747
Control_3	75615652	74615458	0.9868	11.342G	10.672G	0.9409	37181912(49.83%)	98.89	96.74	0.52	0.7428
