# Supplementary material for: An integrated analysis of lncRNA and mRNA expression profiles in the kidneys of mice with lupus nephritis
Source: PeerJ. 2021 Feb 16;9:e10668. doi: 10.7717/peerj.10668 (PMC7894116; doi:10.7717/peerj.10668)
Supplement: Supplemental Information 3 [file peerj-09-10668-s003.xlsx]

## Sheet: Table S3
Table S3. GO biology process terms of upregulated genes in kidney of LN mouse
#Term	Database	ID	Input number	Background number	P-Value	Corrected P-Value	Input	Hyperlink
ion transport	Gene Ontology	GO:0006811	70	561	9.99201e-14	1.79856e-11	Kcnj3|Kcnj1|Ryr2|Slc17a8|Pkd1l1|Tmc2|Kcnj4|Cacna1a|Aspn|Cacna1c|Kcnh7|Slc17a2|Kcnq3|Kcnt1|Cacnb2|Slc22a7|P2rx3|Slc9b2|Slc6a15|Tmc3|Kcnc3|Slc12a3|Kcng1|Ryr3|Kcng3|Cacnb4|Lrrc52|Grin2c|Sfxn4|Slc5a3|Trpc6|Trpc4|Clcnka|mt-Atp8|Ano2|Grik2|Aqp6|Slc10a2|Slco1a6|Slc4a3|Grik4|Gabrr2|Chrne|Slc9a8|Slc12a5|Cacna2d2|Slc4a11|Slc12a1|Chrna1|Mcoln3|Trpm1|Gabra2|Kcnj13|Kcnj11|Gria2|Gria3|Slc24a5|Kcnma1|Catsper2|2…	http://amigo.geneontology.org/amigo/term/GO:0006811
synaptic transmission	Gene Ontology	GO:0007268	23	124	1.89627e-08	1.70664e-06	Npy5r|Cacna1a|Cacna1c|Sncb|Ston2|P2rx3|Cacnb2|Npy2r|Grik2|Nrxn3|Npy6r|Slc12a5|Htr4|Htr1b|Gria2|Chrm3|Kcnma1|Dlgap1|Unc13c|Unc13a|Grm4|Sv2c|Grm7	http://amigo.geneontology.org/amigo/term/GO:0007268
transmembrane transport	Gene Ontology	GO:0055085	43	371	6.5579e-08	3.93474e-06	Slc16a8|Kcnh7|Ryr2|Slc17a8|Cacna1a|Cacna1c|Slc22a13|Slc16a7|Kcnq3|Slc22a7|Ucp1|Slc9b2|Kcnc3|Kcng1|Ryr3|Kcng3|Mfsd4|Sfxn4|Trpc6|Trpc4|Clcnka|Abcc10|Aqp6|Aqp4|Slc25a19|Slc9a8|Slc17a2|Slc12a5|Slc12a1|Kcns1|Slc12a3|Slc47a2|Trpm1|Abcc3|Slc6a2|Slc14a1|Catsper4|Slc24a5|Kcnma1|Catsper2|2010001E11Rik|Slc5a3|Sv2c	http://amigo.geneontology.org/amigo/term/GO:0055085
ion transmembrane transport	Gene Ontology	GO:0034220	22	139	6.97459e-07	2.29716e-05	Slc22a7|P2rx3|Grid2|Ryr2|Grin2c|Aqp6|Pex5l|Grik2|Grik4|Slc12a1|Chrna1|Trpm1|Abcc3|Gria2|Gria3|Slc24a5|Catsper4|Grin3b|Slc4a1|Kcnn2|Slc4a3|Slc26a7	http://amigo.geneontology.org/amigo/term/GO:0034220
synaptic transmission, glutamatergic	Gene Ontology	GO:0035249	11	37	7.57536e-07	2.29716e-05	Cacna1a|Grid2|Gria2|Gria3|Grik2|Grik4|Cacnb4|Grin2c|Grin3b|Unc13a|Als2	http://amigo.geneontology.org/amigo/term/GO:0035249
transport	Gene Ontology	GO:0006810	125	1725	7.65721e-07	2.29716e-05	mt-Nd1|Kcnh7|mt-Nd3|mt-Nd4|Atp8b5|Ngb|Slc22a13|Ano2|Slc6a18|Slc6a12|Slc6a17|Slc6a15|Cpt1b|mt-Nd6|Grid2|Kcng1|Kcng3|Lrrc52|Rph3a|Abcc10|Atg16l2|Clcnka|Slco1a6|Slc26a10|Trpm1|Gabra2|Slc6a2|Slc6a7|Serpina6|Fa2h|2010001E11Rik|Kcnj3|Kcnj1|Pkd1l1|Kcnj4|Aspn|Kcnq3|Slc22a7|Ucp1|Stxbp5l|Doc2g|Ryr3|Ryr2|Grin2c|Slc25a19|Cacna2d2|Slc10a2|Abca13|Slc7a14|Slc7a13|Kcns1|Sec61a2|Slc4a11|Slc14a1|Kcnma1|Slc26a7|Sv2…	http://amigo.geneontology.org/amigo/term/GO:0006810
regulation of ion transmembrane transport	Gene Ontology	GO:0034765	23	163	3.04329e-06	7.8256e-05	Kcnj3|Kcnh7|Tmc2|Kcnj4|Cacna1a|Cacna1c|Kcnj1|Kcnq3|Kcnt1|Kcnc3|Kcng1|Kcng3|Cacnb4|Cacna2d2|Clcnka|Kcns1|Kcnj13|Kcnj11|Catsper4|Kcnma1|Catsper2|Cacnb2|Grm7	http://amigo.geneontology.org/amigo/term/GO:0034765
potassium ion transport	Gene Ontology	GO:0006813	19	120	3.95814e-06	8.90582e-05	Kcnj13|Slc12a5|Kcnj11|Slc24a5|Kcnh7|Kcnj1|Kcnj4|Kcnc3|Kcng1|Kcnj3|Kcng3|Slc9a8|Kcnq3|Kcnma1|Kcnt1|Slc12a1|Kcns1|Kcnn1|Kcnn2	http://amigo.geneontology.org/amigo/term/GO:0006813
visual perception	Gene Ontology	GO:0007601	17	106	1.06344e-05	0.000212688	Rp1|Slitrk6|Col11a1|Gucy2f|Cacnb2|Gabrr2|Rdh5|Ppef2|Rorb|Rgs9|Grk1|Rho|Rpgrip1|Pde6h|Myo3a|Trpm1|Guca1b	http://amigo.geneontology.org/amigo/term/GO:0007601
calcium ion transmembrane transport	Gene Ontology	GO:0070588	16	103	2.89634e-05	0.000521341	Slc24a5|Pkd1l1|Tmc2|Catsper4|Cacnb2|Ryr3|Cacna1c|Catsper2|Cacnb4|Trpc6|Ryr2|Trpc4|Cacna1a|Cacna2d2|Grm7|Trpm1	http://amigo.geneontology.org/amigo/term/GO:0070588
ionotropic glutamate receptor signaling pathway	Gene Ontology	GO:0035235	7	24	9.43512e-05	0.00154393	Grid2|Gria2|Gria3|Grik2|Grik4|Grin2c|Grin3b	http://amigo.geneontology.org/amigo/term/GO:0035235
neurotransmitter transport	Gene Ontology	GO:0006836	9	43	0.000162549	0.00243824	Slc6a2|Slc6a7|Slc6a18|Slc6a12|Slc17a8|Sv2c|Slc6a17|Slc6a15|Gabra2	http://amigo.geneontology.org/amigo/term/GO:0006836
multicellular organismal development	Gene Ontology	GO:0007275	72	987	0.000193621	0.0026809	Trnp1|Tbpl2|Ryr2|Ntng1|Odf4|Spata20|Gnrh1|Uncx|Col19a1|Vegfa|Six2|Tmem198|Hoxc6|Hey2|Mkx|Efnb3|Sim1|Sik1|Banp|Catsper4|Dync2h1|Mapk1ip1|Zglp1|Apela|Hoxb4|Alx4|Rorb|Angpt2|Tdrd12|Cited1|Wnt7b|Robo3|Cml1|Obscn|Msx2|Bmp5|Elavl3|Pdilt|Tbx20|Edil3|Chrdl1|Ntrk1|Mycbpap|Ntrk3|Tbx3|Npm2|Wnt9b|Msx1|Gcm1|Hoxa6|Ctf2|Ctnna2|Zfp335|Pou3f3|Tssk4|Nanog|Sema5b|Erbb4|Egfl6|Plxna3|Sim2|Enah|Hoxc5|Ggnbp1|Catsper2|G…	http://amigo.geneontology.org/amigo/term/GO:0007275
behavioral fear response	Gene Ontology	GO:0001662	7	28	0.000273098	0.00338601	Esr2|Grik2|Als2|Npy2r|Cck|Grm7|Mapk8ip2	http://amigo.geneontology.org/amigo/term/GO:0001662
potassium ion transmembrane transport	Gene Ontology	GO:0071805	15	112	0.000282168	0.00338601	Kcnj3|Kcnj11|Slc24a5|Kcnh7|Kcnj1|Kcnc3|Kcng1|Kcng3|Slc9a8|Kcnq3|Kcnma1|Kcnt1|Kcns1|Kcnn1|Kcnn2	http://amigo.geneontology.org/amigo/term/GO:0071805
protein homooligomerization	Gene Ontology	GO:0051260	19	165	0.000344675	0.00365599	Kcns1|Kcng3|Kctd16|Lgi1|Kcnc3|Cryab|Kctd8|Als2|Kcnma1|Vwa2|Aqp4|Pex11b|Lnx1|Nlgn1|Fas|P2rx3|Kcng1|Hao2|Npm2	http://amigo.geneontology.org/amigo/term/GO:0051260
neuromuscular junction development	Gene Ontology	GO:0007528	7	29	0.000345288	0.00365599	Lrrk2|Als2|Cacnb4|Dok7|Unc13a|Cacna2d2|Chrna1	http://amigo.geneontology.org/amigo/term/GO:0007528
kidney development	Gene Ontology	GO:0001822	13	93	0.000465237	0.00465237	5830428H23Rik|Pou3f3|Kcnj1|Slc12a1|Tet2|Fmn1|Six2|Ren1|Vegfa|Wnt9b|Rpgrip1l|Cited1|Cys1	http://amigo.geneontology.org/amigo/term/GO:0001822
regulation of membrane potential	Gene Ontology	GO:0042391	11	76	0.000930401	0.00851617	Cacna1a|Kcnj11|Kcnh7|Lrrk2|Pex5l|Grik2|Kcnma1|Cacnb4|Grin2c|Chrna1|Chrne	http://amigo.geneontology.org/amigo/term/GO:0042391
eye photoreceptor cell development	Gene Ontology	GO:0042462	5	17	0.000946241	0.00851617	Rpgrip1|Gabrr2|Vegfa|Rorb|Nr2e3	http://amigo.geneontology.org/amigo/term/GO:0042462
synapse assembly	Gene Ontology	GO:0007416	6	26	0.00118846	0.0101868	Slitrk6|Nlgn1|Cacna1a|Nrxn3|Dnm3|Shank2	http://amigo.geneontology.org/amigo/term/GO:0007416
mammary gland alveolus development	Gene Ontology	GO:0060749	5	19	0.0016421	0.0134353	Ccnd1|Prlr|Vegfa|Egf|Erbb4	http://amigo.geneontology.org/amigo/term/GO:0060749
calcium ion import	Gene Ontology	GO:0070509	6	28	0.00179261	0.0140291	Catsper4|Cacna1a|Cacna1c|Catsper2|Trpc4|Cacnb2	http://amigo.geneontology.org/amigo/term/GO:0070509
adult walking behavior	Gene Ontology	GO:0007628	7	39	0.00224633	0.0168475	Efnb3|Cacna1a|Cacna1c|Kcnma1|Cacnb4|Zic1|Cend1	http://amigo.geneontology.org/amigo/term/GO:0007628
sodium ion transport	Gene Ontology	GO:0006814	13	111	0.00245576	0.0176815	Slc4a11|Slc10a2|Slc17a8|Catsper4|Slc24a5|Slc9a8|Slc17a2|2010001E11Rik|Slc5a3|Slc12a1|Slc12a3|Slc9b2|Slc6a15	http://amigo.geneontology.org/amigo/term/GO:0006814
meiosis	Gene Ontology	GO:0007126	11	87	0.00283274	0.0196113	Mns1|Fbxo43|Mapk1ip1|Exo1|Msh5|Ccdc79|Ccnb1ip1|Tdrd12|Sycp2|Mei4|Dmc1	http://amigo.geneontology.org/amigo/term/GO:0007126
negative regulation of insulin secretion	Gene Ontology	GO:0046676	6	31	0.00310139	0.0206759	Nos1|Kcnj11|Irs1|Npff|Pde4c|Stxbp5l	http://amigo.geneontology.org/amigo/term/GO:0046676
gamma-aminobutyric acid signaling pathway	Gene Ontology	GO:0007214	5	22	0.00330173	0.0208424	Cacna1a|Gabrr2|Cacnb4|Htr4|Gabra2	http://amigo.geneontology.org/amigo/term/GO:0007214
sensory perception of sound	Gene Ontology	GO:0007605	13	115	0.00335795	0.0208424	Myo3a|Slitrk6|Aqp4|Slc17a8|Col11a1|Col11a2|Otoa|Kcnma1|Myo1a|Mcoln3|Dfnb59|Cntn5|Grm7	http://amigo.geneontology.org/amigo/term/GO:0007605
nervous system development	Gene Ontology	GO:0007399	27	325	0.00380475	0.0227434	Trnp1|Brsk2|Robo3|Uncx|Vegfa|Vps13a|Nrbp2|Shank1|Ntng1|Efnb3|Sim1|Sim2|Nlgn1|Epha5|Nr2f1|Avil|Fut9|Elavl3|Chrdl1|Ntrk1|Ntrk3|Chac1|Pou3f3|Sema5b|Erbb4|Enah|Zic1	http://amigo.geneontology.org/amigo/term/GO:0007399
chloride transport	Gene Ontology	GO:0006821	10	78	0.00391692	0.0227434	Ano4|Gabrr2|Ano2|Slc12a5|Slc4a1|Slc12a3|Slc26a7|Clcnka|Slc12a1|Gabra2	http://amigo.geneontology.org/amigo/term/GO:0006821
response to stimulus	Gene Ontology	GO:0050896	19	204	0.00425376	0.0239274	Rp1|Myo3a|Slc24a5|Tas2r135|Gucy2f|Tas2r137|Slitrk6|Rdh5|Ppef2|Rorb|Rgs9|Grk1|Tas2r108|Rho|Rpgrip1|Pde6h|Grm7|Trpm1|Guca1b	http://amigo.geneontology.org/amigo/term/GO:0050896
outflow tract morphogenesis	Gene Ontology	GO:0003151	7	44	0.00455309	0.0241046	Npy5r|Tbx20|Tbx3|Npy2r|Vegfa|Msx2|Hey2	http://amigo.geneontology.org/amigo/term/GO:0003151
skeletal system morphogenesis	Gene Ontology	GO:0048705	7	44	0.00455309	0.0241046	5830428H23Rik|Spef2|Col11a1|Col11a2|Fmn1|Hoxb4|Alx4	http://amigo.geneontology.org/amigo/term/GO:0048705
oxidation-reduction process	Gene Ontology	GO:0055114	46	662	0.0069175	0.0355757	mt-Nd1|mt-Nd3|mt-Nd4|mt-Nd6|Nos1|Acox2|Scd1|Akr1c18|Hsd3b5|Ido1|Ddo|Hsd3b2|Kdm5d|Srd5a2|Bdh1|Enox1|mt-Co2|mt-Co3|Ido2|Cox4i2|Rdh5|mt-Cytb|Gpx6|Hao2|Cyp4x1|Tyr|Fads6|Gsto2|Cyp1a1|Tet2|Tpo|Cmah|Akr1d1|P4ha1|Cyp4f14|Hmgcr|Ndufa5|Aldh1a3|Pcyox1l|Mdh1b|Fa2h|Cyp51|Ppox|mt-Atp8|Fasn|Noxred1	http://amigo.geneontology.org/amigo/term/GO:0055114
RNA processing	Gene Ontology	GO:0006396	7	48	0.00742184	0.0371092	Ccnl1|Prpf39|Ccnl2|Adarb2|Adat1|Sfswap|Sugp2	http://amigo.geneontology.org/amigo/term/GO:0006396
ventricular cardiac muscle tissue morphogenesis	Gene Ontology	GO:0055010	5	27	0.00831009	0.0404274	Epo|Myh6|Col11a1|Tnni3|Prox1	http://amigo.geneontology.org/amigo/term/GO:0055010
neuron projection morphogenesis	Gene Ontology	GO:0048812	7	50	0.00927578	0.0439379	Slitrk6|Ugt8a|Zfp335|Als2|Cntnap1|Wnt7b|Brsk2	http://amigo.geneontology.org/amigo/term/GO:0048812
calcium ion transport	Gene Ontology	GO:0006816	13	131	0.00998824	0.0460996	Ryr2|Pkd1l1|Catsper4|Cacna1a|Ryr3|Slc24a5|Catsper2|Cacnb4|Trpc6|Trpc4|Cacnb2|Cacna2d2|Cacna1c	http://amigo.geneontology.org/amigo/term/GO:0006816
fertilization	Gene Ontology	GO:0009566	6	40	0.011243	0.0484339	Ttll5|Spef2|Catsper2|Klk14|Tdrd12|Sycp2	http://amigo.geneontology.org/amigo/term/GO:0009566
muscle contraction	Gene Ontology	GO:0006936	5	29	0.0113013	0.0484339	Actn3|Tbx20|Myom1|Myh1|Myh6	http://amigo.geneontology.org/amigo/term/GO:0006936
lactation	Gene Ontology	GO:0007595	5	29	0.0113013	0.0484339	Ccnd1|Prlr|Ghrhr|Vegfa|Erbb4	http://amigo.geneontology.org/amigo/term/GO:0007595
regulation of excitatory postsynaptic membrane potential	Gene Ontology	GO:0060079	5	30	0.0130406	0.0535196	Grin2c|Npff|Grik2|Mapk8ip2|Grid2	http://amigo.geneontology.org/amigo/term/GO:0060079
cation transport	Gene Ontology	GO:0006812	12	121	0.0130826	0.0535196	Pex5l|Slc9a8|Slc12a5|Grin2c|Sfxn4|Grin3b|Chrna1|Atp8b5|Chrne|P2rx3|Slc9b2|Trpm1	http://amigo.geneontology.org/amigo/term/GO:0006812
stem cell differentiation	Gene Ontology	GO:0048863	5	31	0.0149519	0.058835	Nanog|Msx2|Pou5f1|A2m|Msx1	http://amigo.geneontology.org/amigo/term/GO:0048863
microtubule-based movement	Gene Ontology	GO:0007018	7	55	0.0153625	0.058835	Dnah2|Dnah3|Dnah12|Dync2h1|Dnah8|Kif12|Kifc2	http://amigo.geneontology.org/amigo/term/GO:0007018
steroid hormone mediated signaling pathway	Gene Ontology	GO:0043401	7	55	0.0153625	0.058835	Esr2|Esrrb|Nr0b2|Nr2f1|Rorb|Nr5a2|Nr2e3	http://amigo.geneontology.org/amigo/term/GO:0043401
proton transport	Gene Ontology	GO:0015992	7	56	0.0168561	0.0632104	Slc4a11|mt-Cytb|mt-Atp8|Ucp1|Atp6v1c2|mt-Atp6|Slc9b2	http://amigo.geneontology.org/amigo/term/GO:0015992
rhythmic process	Gene Ontology	GO:0048511	6	44	0.0176143	0.0647057	Enox1|Ciart|Ogt|Rorb|Ppargc1a|Per3	http://amigo.geneontology.org/amigo/term/GO:0048511
single fertilization	Gene Ontology	GO:0007338	5	33	0.019317	0.0668666	Smcp|Ovgp1|Npm2|Cd46|Spag1	http://amigo.geneontology.org/amigo/term/GO:0007338
heterophilic cell-cell adhesion	Gene Ontology	GO:0007157	5	33	0.019317	0.0668666	Tenm2|Umod|Nlgn1|Cbln1|Grid2	http://amigo.geneontology.org/amigo/term/GO:0007157
embryonic forelimb morphogenesis	Gene Ontology	GO:0035115	5	33	0.019317	0.0668666	Tbx3|Msx2|Alx4|Msx1|Rpgrip1l	http://amigo.geneontology.org/amigo/term/GO:0035115
termination of G-protein coupled receptor signaling pathway	Gene Ontology	GO:0038032	5	34	0.0217825	0.0739784	Rgs11|Rgs6|Rgs7|Rgs9|Grk1	http://amigo.geneontology.org/amigo/term/GO:0038032
spermatid development	Gene Ontology	GO:0007286	7	61	0.02588	0.0862666	Nup210l|Pdilt|Acrbp|Tdrd5|Ccnb1ip1|Ybx2|Dmc1	http://amigo.geneontology.org/amigo/term/GO:0007286
fatty acid biosynthetic process	Gene Ontology	GO:0006633	7	64	0.0326389	0.106818	Acsm1|Prkag3|Scd1|Fa2h|Lpl|Fasn|Fads6	http://amigo.geneontology.org/amigo/term/GO:0006633
neuromuscular process controlling balance	Gene Ontology	GO:0050885	6	51	0.034009	0.109315	Cacna1a|Kcnma1|Cntnap1|Grin2c|Shank1|Aldh1a3	http://amigo.geneontology.org/amigo/term/GO:0050885
axonogenesis	Gene Ontology	GO:0007409	9	94	0.0357646	0.112941	Slitrk6|Ntng1|Dst|Als2|Map2|Cck|Tnn|Ctnna2|Brsk2	http://amigo.geneontology.org/amigo/term/GO:0007409
regulation of blood pressure	Gene Ontology	GO:0008217	6	52	0.0369518	0.113278	Corin|Myh6|Cacna1c|Ren1|Npy|Pomc	http://amigo.geneontology.org/amigo/term/GO:0008217
cell maturation	Gene Ontology	GO:0048469	5	39	0.0371301	0.113278	Ren1|Plp1|Ghrhr|Vegfa|Kcnma1	http://amigo.geneontology.org/amigo/term/GO:0048469
embryonic skeletal system morphogenesis	Gene Ontology	GO:0048704	6	53	0.0400527	0.116652	Col11a1|Six2|Alx4|Hoxa6|Hoxb4|Satb2	http://amigo.geneontology.org/amigo/term/GO:0048704
cilium morphogenesis	Gene Ontology	GO:0060271	6	53	0.0400527	0.116652	Spef2|Avil|Cep290|2700049A03Rik|Rpgrip1l|Dync2h1	http://amigo.geneontology.org/amigo/term/GO:0060271
transmembrane receptor protein tyrosine kinase signaling pathway	Gene Ontology	GO:0007169	7	67	0.0404843	0.116652	Erbb4|Epha5|Clnk|Ntrk1|Ntrk3|Insrr|Angpt2	http://amigo.geneontology.org/amigo/term/GO:0007169
amino acid transport	Gene Ontology	GO:0006865	5	40	0.0408282	0.116652	Slc7a14|Slc6a18|Slc6a7|Slc6a15|Slc7a13	http://amigo.geneontology.org/amigo/term/GO:0006865
cartilage development	Gene Ontology	GO:0051216	7	68	0.0433498	0.121921	Il17f|Col11a1|Col11a2|Bmp5|Satb2|Msx1|Msx2	http://amigo.geneontology.org/amigo/term/GO:0051216
BMP signaling pathway	Gene Ontology	GO:0030509	6	55	0.0467362	0.129423	Myh6|Ryr2|Gdf7|Msx1|Msx2|Tmem100	http://amigo.geneontology.org/amigo/term/GO:0030509
axon guidance	Gene Ontology	GO:0007411	10	119	0.0590303	0.15781	Efnb3|Plxna3|Epha5|Gdf7|Ntrk1|Tenm2|Enah|Nkx2-1|Robo3|Lgi1	http://amigo.geneontology.org/amigo/term/GO:0007411
cellular calcium ion homeostasis	Gene Ontology	GO:0006874	7	73	0.0596172	0.15781	Cacna1c|Grik2|Ryr2|Cacnb4|Ank2|Tnni3|Ryr3	http://amigo.geneontology.org/amigo/term/GO:0006874
sodium ion transmembrane transport	Gene Ontology	GO:0035725	7	73	0.0596172	0.15781	Slc4a11|Slc10a2|Slc28a3|Slc24a5|Slc9a8|Slc12a3|Slc6a15	http://amigo.geneontology.org/amigo/term/GO:0035725
cell projection organization	Gene Ontology	GO:0030030	10	120	0.0617809	0.159598	Rp1|Ccdc67|2700049A03Rik|Dync2h1|Ak7|Crocc|Myo1a|Cep290|Ccdc78|Ttc30a2	http://amigo.geneontology.org/amigo/term/GO:0030030
retina development in camera-type eye	Gene Ontology	GO:0060041	6	59	0.0620658	0.159598	Rp1|Rorb|Cep290|Rho|Nr2e3|Rpgrip1	http://amigo.geneontology.org/amigo/term/GO:0060041
palate development	Gene Ontology	GO:0060021	7	75	0.0670464	0.161945	5830428H23Rik|Col11a2|Alx4|Tbx3|Wnt9b|Msx1|Satb2	http://amigo.geneontology.org/amigo/term/GO:0060021
RNA splicing	Gene Ontology	GO:0008380	16	222	0.067415	0.161945	Srsf5|Srek1|Prpf39|Snrnp48|Celf4|Hnrnpu|Hnrnph1|Srsf7|Sfswap|Hnrnpa2b1|Pnn|Ptbp2|Sugp2|Tra2a|Luc7l3|Tardbp	http://amigo.geneontology.org/amigo/term/GO:0008380
response to organic substance	Gene Ontology	GO:0010033	5	46	0.0675633	0.161945	Ren1|Srd5a2|P2rx3|Pou5f1|Nanog	http://amigo.geneontology.org/amigo/term/GO:0010033
cellular protein modification process	Gene Ontology	GO:0006464	5	46	0.0675633	0.161945	Ttll5|Padi1|Ttll9|Ttll10|Ttll3	http://amigo.geneontology.org/amigo/term/GO:0006464
learning	Gene Ontology	GO:0007612	5	46	0.0675633	0.161945	Grm4|Slc12a5|Pak6|Sorcs3|Shank2	http://amigo.geneontology.org/amigo/term/GO:0007612
spermatogenesis	Gene Ontology	GO:0007283	20	292	0.0683768	0.161945	Ttll5|Tssk4|Spef2|Odf4|Pdilt|Catsper2|Spata20|Zglp1|Ak7|Tdrd5|Ggnbp1|Catsper4|Dmc1|Adcy10|Mycbpap|Gal3st1|Tdrd12|Rnf151|Rad51c|Mei4	http://amigo.geneontology.org/amigo/term/GO:0007283
cell fate commitment	Gene Ontology	GO:0045165	6	61	0.0707218	0.165324	Erbb4|Gdf7|Pou5f1|Wnt9b|Hey2|Wnt7b	http://amigo.geneontology.org/amigo/term/GO:0045165
transcription, DNA-dependent	Gene Ontology	GO:0006351	97	1759	0.0717023	0.165467	Trnp1|Tbpl2|Tal2|Nr2f1|Uncx|Sim2|Sim1|Esr2|Zfhx4|Perm1|Ppargc1a|Zbtb8b|Zfp579|Creb3l1|Ovol2|Msx1|Msx2|Tardbp|Zfp488|Nr2e3|Pou2f3|Ddit3|Erbb4|Fubp1|Hoxc5|Hoxc6|Zgpat|Thrsp|Zfp280d|Txlng|Hey2|Ppp1r1b|Nr0b2|Hoxb4|Gata5|Zfp182|Sltm|Snapc3|Tbx3|Elf5|Scai|Zc3h8|Ciart|Nanog|Hoxa6|Rfx4|Pou5f1|Pou5f2|Crebzf|Taf1a|Trps1|Grhl2|Taf1d|Ccnd1|Zkscan3|Ttll5|Brwd1|Zfp335|Mlxipl|Zglp1|Alx4|Nr5a2|Pnn|Zfp879|Pou1f1|…	http://amigo.geneontology.org/amigo/term/GO:0006351
sperm motility	Gene Ontology	GO:0030317	5	47	0.0727768	0.165821	Catsper4|Gas8|Ttll5|Catsper2|Smcp	http://amigo.geneontology.org/amigo/term/GO:0030317
mRNA processing	Gene Ontology	GO:0006397	20	295	0.0741483	0.166834	Luc7l3|Srek1|Pabpn1|Srsf5|Snrnp48|Celf4|Adarb2|Srsf7|Hnrnpu|Rbm26|Hnrnph1|Hnrnpa2b1|Pnn|Ptbp2|Prpf39|Tardbp|Sugp2|Tra2a|Papolb|Sfswap	http://amigo.geneontology.org/amigo/term/GO:0006397
regulation of transcription, DNA-dependent	Gene Ontology	GO:0006355	101	1845	0.0774866	0.169598	Trnp1|Tbpl2|Tal2|Nr2f1|Uncx|Zfp458|Six2|Sim2|Sim1|Esr2|Zfhx4|Perm1|Ppargc1a|Zbtb8b|Zfp579|Creb3l1|Ovol2|Msx1|Cited1|Tardbp|Zfp488|Nr2e3|Pou2f3|Ddit3|Erbb4|Fubp1|Hoxc5|Hoxc6|Zgpat|Thrsp|Zfp280d|Txlng|Hey2|Nr0b2|Hoxb4|Gata5|Zfp182|Ybx2|Sltm|Per3|Hoxa6|Elf5|Pou3f3|Zc3h8|Ciart|Nanog|Tbx3|Rfx4|Sfswap|Pou5f2|Crebzf|Taf1a|Trps1|Grhl2|Taf1d|Ccnd1|Zkscan3|Mkx|Brwd1|Zfp335|Mlxipl|Zglp1|Alx4|Nr5a2|Pnn|Zfp87…	http://amigo.geneontology.org/amigo/term/GO:0006355
positive regulation of catalytic activity	Gene Ontology	GO:0043085	5	48	0.0782037	0.169598	Igf2|Ogt|Mt3|Wnt9b|Npm2	http://amigo.geneontology.org/amigo/term/GO:0043085
negative regulation of phosphatase activity	Gene Ontology	GO:0010923	5	48	0.0782037	0.169598	Slc7a14|Sfi1|Lmtk3|Elfn1|Rbm26	http://amigo.geneontology.org/amigo/term/GO:0010923
negative regulation of transcription, DNA-dependent	Gene Ontology	GO:0045892	26	408	0.083827	0.177547	Crebzf|Tbpl2|Trps1|Mt3|Zkscan3|Hey2|Sim2|Mlxipl|Nr0b2|Ovol2|Tle2|Msx1|Msx2|Tbx20|Zfp488|Rorb|Tbx3|Cited1|Pou3f3|Zc3h8|Ciart|Ddit3|L3mbtl1|Zgpat|Pou5f1|Prox1	http://amigo.geneontology.org/amigo/term/GO:0045892
negative regulation of signal transduction	Gene Ontology	GO:0009968	5	49	0.0838418	0.177547	Scai|Rgs6|Rgs7|Rgs9|Rgs11	http://amigo.geneontology.org/amigo/term/GO:0009968
activation of MAPK activity	Gene Ontology	GO:0000187	6	64	0.0849406	0.177783	Prok1|Lrrk2|Ghr|Ntrk3|Grm4|Pde6h	http://amigo.geneontology.org/amigo/term/GO:0000187
cell differentiation	Gene Ontology	GO:0030154	40	671	0.0882611	0.182609	Acer1|Ntng1|Odf4|Spata20|Uncx|Tssk4|Vegfa|Tdrd5|Srd5a2|Efnb3|Shank1|Sim2|Sim1|Sik1|Robo3|Angpt2|Tdrd12|Cited1|Ggnbp1|Obscn|Elavl3|Pdilt|Chrdl1|Plk5|Ntrk1|Ntrk3|Egfl6|Mycbpap|Ocstamp|Ctnna2|Bmp5|Rnf151|Sema5b|Catsper4|Enah|Col19a1|Catsper2|Gadd45g|Zic1|Tmem100	http://amigo.geneontology.org/amigo/term/GO:0030154
positive regulation of gene expression	Gene Ontology	GO:0010628	14	197	0.0907147	0.185553	Pou3f3|Cd46|Mt3|Avpr2|Fubp1|Gdf7|Ntrk3|Mkx|Ank2|Vegfa|Plp1|Cited1|Nkx2-1|Wnt7b	http://amigo.geneontology.org/amigo/term/GO:0010628
pattern specification process	Gene Ontology	GO:0007389	7	83	0.102069	0.206432	Bmp5|Uncx|Alx4|Mdga2|Zic1|Nkx2-1|Hey2	http://amigo.geneontology.org/amigo/term/GO:0007389
heart morphogenesis	Gene Ontology	GO:0003007	5	54	0.115093	0.230187	Msx1|Epo|Vegfa|Col11a1|Tbx3	http://amigo.geneontology.org/amigo/term/GO:0003007
cytoskeleton organization	Gene Ontology	GO:0007010	7	86	0.117347	0.232115	Ugt8a|Wasf3|Avil|Cap2|Cntnap1|Pclo|Brwd1	http://amigo.geneontology.org/amigo/term/GO:0007010
embryonic digit morphogenesis	Gene Ontology	GO:0042733	5	55	0.121929	0.235992	Tbx3|Msx2|Alx4|Grhl2|Msx1	http://amigo.geneontology.org/amigo/term/GO:0042733
muscle organ development	Gene Ontology	GO:0007517	5	55	0.121929	0.235992	Paxbp1|Msx1|Cryab|Col19a1|Alx4	http://amigo.geneontology.org/amigo/term/GO:0007517
negative regulation of neuron apoptotic process	Gene Ontology	GO:0043524	10	138	0.125447	0.240218	Hsph1|Cacna1a|Grik2|Ppargc1a|Ntrk1|Vegfa|Mt3|Sncb|Cited1|Nrbp2	http://amigo.geneontology.org/amigo/term/GO:0043524
positive regulation of cell proliferation	Gene Ontology	GO:0008284	24	393	0.131692	0.249522	Ghrhr|Prok1|Hmgcr|Ccnd1|Avpr2|Akr1c18|Vegfa|Ctf2|Mlxipl|Pou1f1|Nccrp1|Ntrk3|Epo|Htr4|Cck|Egf|Wnt7b|Pou3f3|Nanog|Erbb4|Il31ra|Tbx3|Apln|Prox1	http://amigo.geneontology.org/amigo/term/GO:0008284
locomotory behavior	Gene Ontology	GO:0007626	7	90	0.139446	0.255362	Als2|Npas3|Mcoln3|Pak6|Nkx2-1|Vps13a|Aldh1a3	http://amigo.geneontology.org/amigo/term/GO:0007626
cilium assembly	Gene Ontology	GO:0042384	7	90	0.139446	0.255362	2700049A03Rik|Ttll3|Rfx4|Dzip1l|Cep290|Rpgrip1l|Dync2h1	http://amigo.geneontology.org/amigo/term/GO:0042384
post-embryonic development	Gene Ontology	GO:0009791	7	90	0.139446	0.255362	5830428H23Rik|Szt2|Kcnj1|Tal2|Tet2|Alx4|Ddx17	http://amigo.geneontology.org/amigo/term/GO:0009791
neuron migration	Gene Ontology	GO:0001764	8	107	0.140449	0.255362	Esr2|Tbx20|Robo3|Nr2f1|Ntrk3|Satb2|Cck|Nkx2-1	http://amigo.geneontology.org/amigo/term/GO:0001764
regulation of gene expression	Gene Ontology	GO:0010468	11	160	0.145197	0.261355	Nanog|Zfp335|Grhl2|Uncx|Irs1|Pou5f1|Satb2|Gnrh1|Hey2|Prox1|Mkx	http://amigo.geneontology.org/amigo/term/GO:0010468
steroid biosynthetic process	Gene Ontology	GO:0006694	5	59	0.151065	0.269225	Srd5a2|Cyp51|Hmgcr|Hsd3b2|Hsd3b5	http://amigo.geneontology.org/amigo/term/GO:0006694
DNA recombination	Gene Ontology	GO:0006310	6	76	0.155837	0.272337	Spidr|Exo1|Dclre1c|Apex2|Rad51c|Mei4	http://amigo.geneontology.org/amigo/term/GO:0006310
steroid metabolic process	Gene Ontology	GO:0008202	6	76	0.155837	0.272337	Akr1d1|Cyp51|Lcat|Hmgcr|Srd5a2|Npc1l1	http://amigo.geneontology.org/amigo/term/GO:0008202
positive regulation of GTPase activity	Gene Ontology	GO:0043547	5	61	0.166632	0.288401	Rgs6|Rgs7|Rgs9|Lrrk2|Rgs11	http://amigo.geneontology.org/amigo/term/GO:0043547
lipid metabolic process	Gene Ontology	GO:0006629	25	426	0.170427	0.292161	Ugt8a|Acer1|Acox2|Prkag3|Cyp51|Mboat2|Fasn|Srd5a2|Npc1l1|Cpt1b|Plcd4|Fads6|Fam57b|Scd1|Acsm1|Akr1d1|Gdpd3|Lpl|Hmgcr|Gal3st1|Lcat|Fa2h|Pnpla3|Pnpla1|Thrsp	http://amigo.geneontology.org/amigo/term/GO:0006629
vasculogenesis	Gene Ontology	GO:0001570	5	62	0.174643	0.296117	5830428H23Rik|Cited1|Tmem100|Hey2|Tnni3	http://amigo.geneontology.org/amigo/term/GO:0001570
glucose homeostasis	Gene Ontology	GO:0042593	7	96	0.176025	0.296117	Mlxipl|Cacna1c|Pomc|Igfbp5|Gcgr|Gpr21|Stxbp5l	http://amigo.geneontology.org/amigo/term/GO:0042593
memory	Gene Ontology	GO:0007613	5	63	0.182799	0.304665	Igf2|Pak6|Sorcs3|Shank2|Grm7	http://amigo.geneontology.org/amigo/term/GO:0007613
peptidyl-tyrosine phosphorylation	Gene Ontology	GO:0018108	7	98	0.189052	0.307301	Erbb4|Epha5|Ntrk1|Insrr|Clk1|Clk4|Egf	http://amigo.geneontology.org/amigo/term/GO:0018108
intracellular signal transduction	Gene Ontology	GO:0035556	21	356	0.189333	0.307301	Rp1|Ppp1r1b|Sik1|Stac3|Gucy2f|Rgs11|Dcdc2c|Clnk|Rgs6|Dclk2|Nrgn|Plcd4|Rgs7|Gucy2g|Unc13c|Adcy10|Unc13a|Dgkb|Pak6|Rgs9|Stac	http://amigo.geneontology.org/amigo/term/GO:0035556
regulation of Rho protein signal transduction	Gene Ontology	GO:0035023	5	64	0.191092	0.307301	Obscn|Arhgef19|Als2|Arhgef38|Eps8l1	http://amigo.geneontology.org/amigo/term/GO:0035023
multicellular organism growth	Gene Ontology	GO:0035264	6	81	0.191209	0.307301	Slitrk6|5830428H23Rik|Grhl2|Tal2|Slc12a5|Slco1a6	http://amigo.geneontology.org/amigo/term/GO:0035264
neuropeptide signaling pathway	Gene Ontology	GO:0007218	7	100	0.202458	0.31967	Npy5r|Npy6r|Npb|Npy2r|Npy|Pomc|Npff	http://amigo.geneontology.org/amigo/term/GO:0007218
neuron differentiation	Gene Ontology	GO:0030182	7	100	0.202458	0.31967	Brsk2|Chrdl1|Corin|Psd2|Wnt9b|Dync2h1|Wnt7b	http://amigo.geneontology.org/amigo/term/GO:0030182
cell morphogenesis	Gene Ontology	GO:0000902	5	68	0.225504	0.351742	Msx1|Shroom1|Vpreb1|Gje1|Cap2	http://amigo.geneontology.org/amigo/term/GO:0000902
positive regulation of transcription from RNA polymerase II promoter	Gene Ontology	GO:0045944	41	758	0.226678	0.351742	Igf2|Nos1|Il17f|Tet2|Vegfa|Taf9|Hey2|Esr2|Mlxipl|Ogt|Nr2f1|Ppargc1a|Hoxb4|Alx4|Creb3l1|Nr5a2|Pomc|Msx1|Gata5|Tardbp|Pou1f1|Esrrb|Tbx20|Six2|Nr2e3|Gcm1|Nkx2-1|Paxbp1|Pou2f3|Pou3f3|Ddx17|Bmp5|Ddit3|Nanog|Rfx4|Fubp1|Trp53bp1|Mamstr|Pou5f1|Satb2|Prox1	http://amigo.geneontology.org/amigo/term/GO:0045944
exocytosis	Gene Ontology	GO:0006887	6	86	0.229309	0.352782	Sycn|Brsk2|Unc13c|Unc13a|Gcgr|Stxbp5l	http://amigo.geneontology.org/amigo/term/GO:0006887
protein autophosphorylation	Gene Ontology	GO:0046777	10	159	0.23135	0.352906	Myo3a|Erbb4|Lrrk2|Ntrk1|Grk1|Mapk15|Insrr|Clk1|Ntrk3|Clk4	http://amigo.geneontology.org/amigo/term/GO:0046777
anterior/posterior pattern specification	Gene Ontology	GO:0009952	7	105	0.237459	0.359182	Hoxc5|Hoxb4|Hoxc6|Hoxa6|Msx1|Msx2|Alx4	http://amigo.geneontology.org/amigo/term/GO:0009952
fatty acid metabolic process	Gene Ontology	GO:0006631	9	145	0.259005	0.388508	Cpt1b|Ghr|Acsm1|Prkag3|Scd1|Fa2h|Acox2|Fasn|Fads6	http://amigo.geneontology.org/amigo/term/GO:0006631
forebrain development	Gene Ontology	GO:0030900	5	72	0.26157	0.389113	Rfx4|Lrp2|Nr2f1|Dync2h1|Msx1	http://amigo.geneontology.org/amigo/term/GO:0030900
elevation of cytosolic calcium ion concentration	Gene Ontology	GO:0007204	7	109	0.266768	0.393593	Cacna1a|Cacna1c|Ric3|Ptger3|Npy2r|Trpc6|Npff	http://amigo.geneontology.org/amigo/term/GO:0007204
hemopoiesis	Gene Ontology	GO:0030097	5	73	0.270793	0.396283	5830428H23Rik|Angpt2|Tet2|Vpreb1|Hoxb4	http://amigo.geneontology.org/amigo/term/GO:0030097
peptidyl-serine phosphorylation	Gene Ontology	GO:0018105	5	74	0.280085	0.406575	Myo3a|Epo|Brsk2|Lrrk2|Clk1	http://amigo.geneontology.org/amigo/term/GO:0018105
protein phosphorylation	Gene Ontology	GO:0006468	31	584	0.299841	0.431771	Brsk2|Lrrk2|Ccnd1|Prkag3|Dclk2|Nek10|Nrbp2|Sik1|Epha5|Cdk15|Mapk15|Mapk10|Rho|Clk1|Clk4|Obscn|Lmtk3|Gucy2f|Gucy2g|Plk5|Ntrk1|Ntrk3|Insrr|Phkg1|Myo3a|Tssk4|Erbb4|Mylk4|Grk1|BC030499|Pak6	http://amigo.geneontology.org/amigo/term/GO:0006468
positive regulation of protein phosphorylation	Gene Ontology	GO:0001934	8	133	0.305016	0.435738	Igf2|Akap5|Lrrk2|Ccnd1|Mapk15|Vegfa|Prom2|Dok7	http://amigo.geneontology.org/amigo/term/GO:0001934
brain development	Gene Ontology	GO:0007420	7	117	0.327915	0.45858	Esr2|Zfp335|Grhl2|Ak7|Zic1|Rpgrip1l|Nkx2-1	http://amigo.geneontology.org/amigo/term/GO:0007420
response to hypoxia	Gene Ontology	GO:0001666	6	98	0.328415	0.45858	Ryr2|Cryab|Kcnma1|Epo|Vegfa|P2rx3	http://amigo.geneontology.org/amigo/term/GO:0001666
cell adhesion	Gene Ontology	GO:0007155	24	452	0.328649	0.45858	Dst|Ajap1|Esam|Nlgn1|Tln2|Cntnap1|Tenm2|Col4a3|Cntnap4|Ncam2|Col7a1|Cdh20|Edil3|Nrxn3|Igfals|Egfl6|Ctnna2|Ctnna3|Zan|Sspo|Col19a1|Pcdhga4|Cntn5|Cuzd1	http://amigo.geneontology.org/amigo/term/GO:0007155
ossification	Gene Ontology	GO:0001503	5	80	0.336899	0.463022	Igf2|Msx2|Chrdl1|Bmp5|Col11a2	http://amigo.geneontology.org/amigo/term/GO:0001503
lipid catabolic process	Gene Ontology	GO:0016042	6	99	0.336977	0.463022	Akr1d1|Plcd4|Irs1|Pnpla3|Pnpla1|Lpl	http://amigo.geneontology.org/amigo/term/GO:0016042
canonical Wnt receptor signaling pathway	Gene Ontology	GO:0060070	5	81	0.346483	0.471236	Ccnd1|Ryr2|Myh6|Wnt9b|Wnt7b	http://amigo.geneontology.org/amigo/term/GO:0060070
regulation of transcription from RNA polymerase II promoter	Gene Ontology	GO:0006357	17	317	0.349632	0.471236	Gata5|Rfx4|Elf5|Zfp488|Ovol2|Mamstr|Alx4|Epo|Vegfa|Nr5a2|Ucp1|Msx2|Brwd1|Hey2|Pou2f3|Nkx2-1|Mlxipl	http://amigo.geneontology.org/amigo/term/GO:0006357
positive regulation of transcription, DNA-dependent	Gene Ontology	GO:0045893	27	518	0.350809	0.471236	Nos1|Mt3|Npas3|Zkscan3|Esr2|Mlxipl|Gdf7|Ppargc1a|Ovol2|Cited1|Gata5|Nr5a2|Pou1f1|Tbx20|Rorb|Tbx3|Nkx2-1|Egf|Pou3f3|Ddit3|Nanog|Erbb4|Epo|Cep290|Pou5f1|Zic1|Prox1	http://amigo.geneontology.org/amigo/term/GO:0045893
response to drug	Gene Ontology	GO:0042493	7	121	0.359296	0.479061	Igf2|Ren1|Kcnj11|Ntrk1|Slc12a5|Slco1a6|Htr1b	http://amigo.geneontology.org/amigo/term/GO:0042493
response to oxidative stress	Gene Ontology	GO:0006979	6	104	0.380065	0.503028	mt-Nd3|Lrrk2|Tpo|Mt3|Als2|Gpx6	http://amigo.geneontology.org/amigo/term/GO:0006979
regulation of cell proliferation	Gene Ontology	GO:0042127	8	144	0.38481	0.505589	Trnp1|Esr2|Fas|Fa2h|Tbx3|Nr5a2|Dusp15|Adam33	http://amigo.geneontology.org/amigo/term/GO:0042127
response to lipopolysaccharide	Gene Ontology	GO:0032496	5	87	0.404123	0.527117	Cited1|Ido1|Nkx2-1|Palm3|Ptger3	http://amigo.geneontology.org/amigo/term/GO:0032496
negative regulation of transcription from RNA polymerase II promoter	Gene Ontology	GO:0000122	28	556	0.418125	0.538153	Trps1|Ccnd1|Vegfa|Hey2|Mkx|Sim2|Sik1|Mlxipl|Nr0b2|Zglp1|Nr2f1|Hoxb4|Mapk15|Msx1|Msx2|Hnrnpa2b1|Pou1f1|Tbx20|Per3|Tbx3|Nr2e3|Esr2|Nkx2-1|Pou3f3|Nanog|Pou5f1|Satb2|Prox1	http://amigo.geneontology.org/amigo/term/GO:0000122
negative regulation of apoptotic process	Gene Ontology	GO:0043066	20	393	0.421526	0.538153	Pou3f3|Nos1|Kcnj1|Fas|Erbb4|Epo|Mt3|Cd59b|Npy5r|Cryab|Taf9|Grk1|Tbx3|Vegfa|Hmgcr|Gnrh1|Adamts20|Msx1|Msx2|Sycp2	http://amigo.geneontology.org/amigo/term/GO:0043066
endocytosis	Gene Ontology	GO:0006897	8	149	0.421553	0.538153	Eqtn|Lrp2|Ghr|Sgip1|Lrp1b|Tfrc|Ston2|Dnm3	http://amigo.geneontology.org/amigo/term/GO:0006897
phosphorylation	Gene Ontology	GO:0016310	33	665	0.440686	0.558616	Brsk2|Lrrk2|Ak7|Pik3c2g|Dgkb|Dclk2|Nek10|Sik1|Epha5|Nmrk2|Cdk15|Mapk15|Mapk10|Clk1|Clk4|Obscn|Lmtk3|Ckb|Ntrk1|Ntrk3|Insrr|Phkg1|Myo3a|Tssk4|Erbb4|Mpp3|Mylk4|Pfkfb2|Grk1|Akap8l|BC030499|Pak6|Mapk8ip2	http://amigo.geneontology.org/amigo/term/GO:0016310
transcription from RNA polymerase II promoter	Gene Ontology	GO:0006366	20	398	0.444219	0.559156	Pou1f1|Pou3f3|Nkx2-1|Elf5|Nr5a2|Tbx20|Zfp488|Fubp1|Trp53bp1|Mamstr|Mkx|Creb3l1|Pou5f1|Ovol2|Msx1|Msx2|Gata5|Hey2|Prox1|Tardbp	http://amigo.geneontology.org/amigo/term/GO:0006366
G-protein coupled receptor signaling pathway	Gene Ontology	GO:0007186	30	606	0.451384	0.56423	Ghrhr|Npy5r|Avpr2|Akr1c18|Npb|Gpr26|Gpr21|Rgs6|Ptger3|Npy2r|Rgs7|Htr1b|Rho|Gcgr|Rgs9|Lgr6|Tas2r135|Tas2r137|Rorb|Npy6r|Gpr75|Htr4|Vipr1|P2ry4|Rgs11|Chrm3|Tas2r108|Apln|Grm4|Grm7	http://amigo.geneontology.org/amigo/term/GO:0007186
response to stress	Gene Ontology	GO:0006950	6	113	0.45746	0.564587	Ddit3|Hsph1|Gadd45g|Ahsa2|Pak6|Chordc1	http://amigo.geneontology.org/amigo/term/GO:0006950
signal transduction	Gene Ontology	GO:0007165	55	1126	0.457942	0.564587	Ghrhr|Rhpn1|Npy5r|Avpr2|Npas3|Kcnh7|Ppp2r2b|Gpr21|Gpr26|Tas2r135|Ppp1r1a|Sim2|Sim1|Ppp1r1b|Npy2r|Fas|Plcd4|Ptger3|Tenm2|Rgs6|Htr1b|Rho|Pomc|Gcgr|Pde11a|Gabrr2|Apln|Akap5|Irs1|Lgr6|Arhgap40|Tas2r137|Baiap2l2|Grik2|Npy6r|Gpr75|Htr4|Wnt9b|Vipr1|Pde4c|Trpm1|P2ry4|Wnt7b|Per3|Erbb4|Plxna3|Chrm3|Grk1|Tas2r108|Ank2|Ppp1r14c|Unc13c|Grm4|Grm7|Insrr	http://amigo.geneontology.org/amigo/term/GO:0007165
regulation of cell cycle	Gene Ontology	GO:0051726	5	96	0.489038	0.598822	Ccnd1|Txlng|Ovol2|Trnp1|Gadd45g	http://amigo.geneontology.org/amigo/term/GO:0051726
lung development	Gene Ontology	GO:0030324	5	98	0.507361	0.617061	Ccdc39|Nkx2-1|Vegfa|Sim2|Wnt7b	http://amigo.geneontology.org/amigo/term/GO:0030324
organ morphogenesis	Gene Ontology	GO:0009887	5	99	0.516424	0.623868	Igf2|Tbx3|Nkx2-1|Sycp2|Wnt9b	http://amigo.geneontology.org/amigo/term/GO:0009887
embryo development	Gene Ontology	GO:0009790	5	101	0.534336	0.641203	Scel|Szt2|Nanog|Hmgcr|Npm2	http://amigo.geneontology.org/amigo/term/GO:0009790
positive regulation of ERK1 and ERK2 cascade	Gene Ontology	GO:0070374	5	104	0.560622	0.668291	Mt3|Vegfa|Hmgcr|Erbb4|Esr2	http://amigo.geneontology.org/amigo/term/GO:0070374
protein folding	Gene Ontology	GO:0006457	5	112	0.626824	0.741259	Pdilt|Nktr|Cryab|Ric3|Cct6b	http://amigo.geneontology.org/amigo/term/GO:0006457
in utero embryonic development	Gene Ontology	GO:0001701	11	245	0.63007	0.741259	Myh6|Zfp335|Grhl2|Esrrb|Tbx3|Vegfa|Wnt9b|Msx1|Rpgrip1l|Tmem100|Wnt7b	http://amigo.geneontology.org/amigo/term/GO:0001701
cell proliferation	Gene Ontology	GO:0008283	8	180	0.635779	0.743118	Lrp2|Nanog|Tbx20|Hoxb4|Col4a3|Six2|Vegfa|Tyr	http://amigo.geneontology.org/amigo/term/GO:0008283
methylation	Gene Ontology	GO:0032259	7	161	0.65642	0.762294	Trmt13|Nsun7|Mettl17|Tyms|Setd4|Mettl7b|Tyw3	http://amigo.geneontology.org/amigo/term/GO:0032259
carbohydrate metabolic process	Gene Ontology	GO:0005975	8	187	0.677748	0.782017	Ppp1r1a|Igf2|Ovgp1|Hhipl2|Ppp1r3a|Chst9|Mdh1b|Phkg1	http://amigo.geneontology.org/amigo/term/GO:0005975
angiogenesis	Gene Ontology	GO:0001525	8	198	0.737383	0.845407	Prok1|Nrxn3|Epo|Vegfa|Ovol2|Angpt2|Tmem100|Egf	http://amigo.geneontology.org/amigo/term/GO:0001525
cell surface receptor signaling pathway	Gene Ontology	GO:0007166	5	130	0.751807	0.856489	Gcgr|Ghrhr|Col4a3|Cd59b|Vipr1	http://amigo.geneontology.org/amigo/term/GO:0007166
Wnt receptor signaling pathway	Gene Ontology	GO:0016055	7	187	0.797417	0.902736	Lgr6|Ccnd1|Tle2|Ddit3|Wnt9b|Tmem198|Wnt7b	http://amigo.geneontology.org/amigo/term/GO:0016055
positive regulation of cell migration	Gene Ontology	GO:0030335	5	140	0.806324	0.907114	Lgr6|Vegfa|Irs1|Erbb4|Ntrk3	http://amigo.geneontology.org/amigo/term/GO:0030335
immune response	Gene Ontology	GO:0006955	6	167	0.816698	0.912949	Fas|Sbspon|C8a|Oas2|Oas1b|Vpreb1	http://amigo.geneontology.org/amigo/term/GO:0006955
positive regulation of apoptotic process	Gene Ontology	GO:0043065	10	265	0.821654	0.912949	Ddit3|Esr2|Cck|Fas|Kcnma1|Gadd45g|Ido1|Adcy10|Msx2|Aldh1a3	http://amigo.geneontology.org/amigo/term/GO:0043065
proteolysis	Gene Ontology	GO:0006508	22	549	0.835529	0.92267	Dpp10|Prss35|Adamts8|Klk14|Adgb|Usp29|Tmprss11b|Mep1b|Prss53|Ren1|Usp17la|Adam33|Adamts20|Metap1d|Corin|Masp2|Adam1a|Psmb11|Cd46|Adam21|Adam28|Acy1	http://amigo.geneontology.org/amigo/term/GO:0006508
metabolic process	Gene Ontology	GO:0008152	22	556	0.851364	0.934424	Ugt8a|Acox2|Fasn|Hsd3b2|Dgkb|Mettl7b|Bdh1|Rdh5|Phospho1|Pde11a|Tyr|Gsto2|Acsm1|Ndst3|Ndst4|Arsi|Oxct2a|Aldh1a3|Pfkfb2|Pnpla3|Pnpla1|Acy1	http://amigo.geneontology.org/amigo/term/GO:0008152
intracellular protein transport	Gene Ontology	GO:0006886	6	188	0.891888	0.972968	Grik2|Tomm20l|Rph3a|Ston2|Ap1s3|Stx19	http://amigo.geneontology.org/amigo/term/GO:0006886
dephosphorylation	Gene Ontology	GO:0016311	5	164	0.898697	0.974491	Dusp15|Inpp5j|Ppef2|Ppp1r3a|Phospho1	http://amigo.geneontology.org/amigo/term/GO:0016311
negative regulation of cell proliferation	Gene Ontology	GO:0008285	10	310	0.931973	0.996162	Nos1|Bmp5|Esr2|Erbb4|Plk5|Ovol2|Nr2e3|Msx1|Msx2|Prox1	http://amigo.geneontology.org/amigo/term/GO:0008285
ATP catabolic process	Gene Ontology	GO:0006200	5	179	0.934602	0.996162	Myo3a|Atp6v1c2|Myh6|Msh5|Abcc3	http://amigo.geneontology.org/amigo/term/GO:0006200
protein ubiquitination	Gene Ontology	GO:0016567	5	180	0.936533	0.996162	Trim69|Klhl41|Rnf151|Ccnb1ip1|Rnf182	http://amigo.geneontology.org/amigo/term/GO:0016567
DNA repair	Gene Ontology	GO:0006281	9	290	0.94082	0.996162	Hus1b|Spidr|Rad9b|Exo1|Trp53bp1|Apex2|Dmc1|Rad51c|Dclre1c	http://amigo.geneontology.org/amigo/term/GO:0006281
vesicle-mediated transport	Gene Ontology	GO:0016192	5	187	0.948675	0.998605	Stx19|Stxbp5l|Scfd2|Ston2|Ap1s3	http://amigo.geneontology.org/amigo/term/GO:0016192
inflammatory response	Gene Ontology	GO:0006954	6	229	0.966008	0.999878	Il17f|Ido1|S100a7a|Plp1|Il17re|Mep1b	http://amigo.geneontology.org/amigo/term/GO:0006954
chromatin modification	Gene Ontology	GO:0016568	7	259	0.967791	0.999878	Banp|Ogt|Tet2|L3mbtl1|Satb2|Kdm5d|Npm2	http://amigo.geneontology.org/amigo/term/GO:0016568
apoptotic process	Gene Ontology	GO:0006915	16	531	0.985184	0.999878	Zc3h8|Chac1|Brsk2|Ngb|Trim69|Sltm|Ogt|Tia1|Ppp2r2b|Epo|Ddit3|Cck|Fas|Cited1|Gadd45g|Erbb4	http://amigo.geneontology.org/amigo/term/GO:0006915
innate immune response	Gene Ontology	GO:0045087	5	231	0.987663	0.999878	C8a|Oas1b|Mx2|Oas2|Masp2	http://amigo.geneontology.org/amigo/term/GO:0045087
immune system process	Gene Ontology	GO:0002376	8	324	0.988946	0.999878	Il31ra|Exo1|Mx2|Masp2|C8a|Oas2|Oas1b|Dclre1c	http://amigo.geneontology.org/amigo/term/GO:0002376
cell cycle	Gene Ontology	GO:0007049	17	590	0.993189	0.999878	Trnp1|Ddit3|Sik1|Brsk2|Spag5|Txlng|Tet2|Plk5|Crocc|Ccnd1|Apex2|Dmc1|Spice1|Sycp2|Dmtf1|Cuzd1|Banp	http://amigo.geneontology.org/amigo/term/GO:0007049
response to DNA damage stimulus	Gene Ontology	GO:0006974	8	369	0.997265	0.999878	Spidr|Ccnd1|Exo1|Plk5|Trp53bp1|Apex2|Rad51c|Dclre1c	http://amigo.geneontology.org/amigo/term/GO:0006974
cell division	Gene Ontology	GO:0051301	7	344	0.997754	0.999878	Brsk2|Ccnd1|Spag5|Plk5|Spice1|Sycp2|Cuzd1	http://amigo.geneontology.org/amigo/term/GO:0051301
protein transport	Gene Ontology	GO:0015031	11	557	0.999878	0.999878	Scfd2|Atg16l2|Cep290|Rph3a|Rab3c|Rasef|Ap1s3|Nacad|Vps13a|Stxbp5l|Sec61a2	http://amigo.geneontology.org/amigo/term/GO:0015031
