# Supplementary material for: An integrated analysis of lncRNA and mRNA expression profiles in the kidneys of mice with lupus nephritis
Source: PeerJ. 2021 Feb 16;9:e10668. doi: 10.7717/peerj.10668 (PMC7894116; doi:10.7717/peerj.10668)
Supplement: Supplemental Information 4 [file peerj-09-10668-s004.xlsx]

## Sheet: Table S4
Table S4. GO biology process terms of downregulated genes in kidney of LN mouse
#Term	Database	ID	Input number	Background number	P-Value	Corrected P-Value	Input	Hyperlink
immune system process	Gene Ontology	GO:0002376	78	324	0	0	Ptpn22|Tnfaip8l2|Cfb|Masp1|C1qb|Fcna|Tlr13|Psmb9|Psmb8|Lgals3|Iigp1|Cd74|Clec4n|H2-K1|Cd300a|Irf7|Btk|Olr1|Tnfrsf13b|H2-T23|Lat2|H2-Q10|C1qa|AF251705|Cd300lf|B2m|Cd7|H2-Eb1|C8g|C3|Hc|Rnf125|Irgm1|Klrg1|H2-Q7|Cd300lh|Tap1|Ltf|H2-D1|S100a8|Lcn2|H2-DMa|Amica1|H2-Aa|Clec4a2|Oasl1|H2-DMb1|S100a9|Prg2|C2|Cd300lb|Cd86|Hfe|Axl|Pdcd1|Lbp|Clec5a|C1s1|Cd1d1|Cfh|Cfi|C1rb|H2-Ab1|Cfd|C1ra|Msrb1|Cd14|Tlr2|Kcnn4…	http://amigo.geneontology.org/amigo/term/GO:0002376
oxidation-reduction process	Gene Ontology	GO:0055114	108	662	5.5278e-13	9.89476e-11	Cyp4f18|Cyp24a1|Cyp1b1|Uox|Maob|Maoa|Cygb|Aox4|Cryl1|Gpx1|Gpx3|Akr1b8|Gpx4|Gpx7|Steap1|Steap4|Iyd|Nos2|Gsto1|Dpyd|Aass|Hsd17b4|Msrb1|Cyp4b1|Alox5ap|Ethe1|Fth1|Marc1|Dhrs9|Kmo|Dhrs7|Idh1|Pxdn|Hsd17b12|Hsd17b13|Creg1|Sep15|Qdpr|Alox5|Hsdl2|Epx|Nqo1|Gpd1|Cyp2e1|Cyp4a14|Sepw1|Agmo|Qsox1|Cyp2c70|Alox15|Mgst1|Dio2|Dcxr|Acad11|Ehhadh|Txnrd3|Txnrd1|Prdx4|Cyp2f2|Akr1c13|Tsta3|Acox1|Grhpr|Prdx1|Lox|Srxn1|B…	http://amigo.geneontology.org/amigo/term/GO:0055114
inflammatory response	Gene Ontology	GO:0006954	53	229	1.26477e-12	1.50929e-10	Cxcl1|Il18|Nos2|Cxcl5|Cd163|Ackr1|Adam8|Pla2g7|Cd14|Tlr13|Ptafr|Selp|Mapkapk2|P2rx7|Ccl11|Ephx2|Tnfrsf1b|Ccl22|Olr1|Sdc1|Alox5|Slc11a1|C3|Hc|Il1f6|Cela1|Ccl2|Lipa|S100a8|Ccl5|Ccl8|Vnn1|F2r|Ccr2|Ccr3|S100a9|Cxcr6|Agtr2|Tlr8|Axl|Chil3|Cnr2|Crlf2|Clec7a|Tlr2|Cyba|Tlr6|Tlr7|Cxcl11|Cxcl13|Tlr9|Ccl24|Ly86	http://amigo.geneontology.org/amigo/term/GO:0006954
immune response	Gene Ontology	GO:0006955	42	167	1.641e-11	1.46869e-09	Il18|Cxcl1|Cxcl5|Was|Cd74|Ccl11|H2-K1|Tnfrsf1b|H2-T23|Irf8|H2-Q10|H2-Eb1|Fcgrt|Il1f6|Ccl2|H2-D1|Ccl6|Ccl5|H2-DMa|H2-Q7|Ccl9|H2-Aa|Oasl1|Ifi44l|Ccr2|Prg2|Ccl8|Hfe|Bmp6|Ccl22|Cd1d1|H2-Ab1|Enpp2|H2-DMb1|Tlr2|Ccl28|Tlr6|Cxcl11|Cxcl13|Tlr9|Ccl24|Tnfsf13b	http://amigo.geneontology.org/amigo/term/GO:0006955
antigen processing and presentation	Gene Ontology	GO:0019882	19	40	3.6956e-11	2.64605e-09	Cd74|H2-K1|Rab34|Rab32|Cd1d1|H2-Ab1|H2-T23|H2-Aa|H2-Q10|H2-DMa|H2-DMb1|H2-D1|Rab3b|Psmb9|Psmb8|Fcgrt|Hfe|H2-Q7|H2-Eb1	http://amigo.geneontology.org/amigo/term/GO:0019882
innate immune response	Gene Ontology	GO:0045087	49	231	2.43071e-10	1.45032e-08	Tnfaip8l2|Msrb1|Masp1|Cd14|Tlr13|Lgals3|Iigp1|Clec4n|Irf7|Trim31|Cfi|C1qb|C1qa|Trim59|C8g|C3|Hc|Klrg1|Fcgr1|Lcn2|Vnn1|Clec4a2|Oasl1|S100a9|S100a8|C2|Axl|Irgm1|Lbp|Clec5a|C1s1|Cd1d1|Cfh|Clec7a|C1rb|Cfd|C1ra|Cfb|Fcna|Tlr2|Cybb|Cyba|Tlr6|Tlr7|Unc93b1|Tlr8|Tlr9|Btk|Ly86	http://amigo.geneontology.org/amigo/term/GO:0045087
collagen catabolic process	Gene Ontology	GO:0030574	13	22	1.42758e-09	7.30103e-08	Mmp14|Ctsk|Mmp10|Adamts2|Ctsb|Mmp19|Mmp8|Mmp9|Mmp7|Ctss|Mmp2|Mmp3|Prtn3	http://amigo.geneontology.org/amigo/term/GO:0030574
chemotaxis	Gene Ontology	GO:0006935	30	110	1.63662e-09	7.32388e-08	Cxcl5|Ptafr|Hrg|Ear2|Ccl11|Cxcr6|Fgf10|Ccl2|Ccl6|Cx3cr1|Ccl5|Ccl8|Ccl9|Ccr2|Ccr3|S100a9|S100a8|Cxcr4|Cmtm3|Cmtm7|C3ar1|Enpp2|Ccl28|Cxcl11|Cxcl13|Ccl22|Cmklr1|Ccl24|Cxcl17|Cxcl16	http://amigo.geneontology.org/amigo/term/GO:0006935
metabolic process	Gene Ontology	GO:0008152	82	556	4.94061e-08	1.96527e-06	Smpdl3b|Grhpr|Smpdl3a|Dnph1|Ugp2|Dhrs9|Hexa|Dhrs7|Asnsd1|Hexb|Pcx|Acsl4|Psat1|Ykt6|Aldh3b1|Acaa2|Acsbg1|Acsf2|Arsj|Gsta3|Bdh2|Folh1|Hsd17b12|Hsd17b13|Ephx2|Eci2|Dcxr|Cbr3|Kif18b|Lyz2|Camk1|Sptlc3|Pklr|Gla|Gusb|Cps1|Agpat9|Gstm6|Pld4|Hmgcs2|Acox1|Camk1g|Ugt1a1|Aass|Nat2|Acsm3|Gstm5|H6pd|Npl|Gstp2|Gsto1|Ugt1a7c|Sulf1|Gns|Aldh7a1|Kmo|Aldh1a7|Hsd17b4|Fuca1|Aldh1a2|Alpl|Chil3|Suclg2|Man2b2|Aldh1a1|Man…	http://amigo.geneontology.org/amigo/term/GO:0008152
lipid metabolic process	Gene Ontology	GO:0006629	67	426	7.59185e-08	2.71788e-06	Sult1b1|Apod|Apoe|Apob|Degs1|Sult1d1|Slc16a1|Enpp6|Wnt10b|Ppara|Pla2g16|Acsl4|Hadh|Pla2g7|Mboat1|Pla2g5|Acsbg1|Pld4|Decr1|Hsd17b12|Ephx2|Cpt1a|Pck1|Npc2|Mttp|Hrasls|Plcxd3|Eci1|Plcxd1|Ces1d|Gpx1|Sptlc3|C3|Agpat9|Plin1|Pla2g15|Hmgcs2|Daglb|Npc1|Pemt|Acsm3|Sult1a1|Gdpd1|Mogat2|Mogat1|Decr2|Acot12|Hsd17b4|Naaa|Lipa|Acox1|Pcx|Sult4a1|Acaa2|Serinc5|Acsf2|Cpt2|Enpp2|Apoa1|Hacl1|Alox15|Fabp5|Apoc2|Slc27…	http://amigo.geneontology.org/amigo/term/GO:0006629
iron ion homeostasis	Gene Ontology	GO:0055072	14	33	8.65476e-08	2.81673e-06	Lcn2|Slc40a1|Slc11a1|Mfi2|Hfe|Epb4.2|Hmox1|Trf|Ltf|Sfxn1|Steap1|Bdh2|Steap4|Fech	http://amigo.geneontology.org/amigo/term/GO:0055072
proteolysis involved in cellular protein catabolic process	Gene Ontology	GO:0051603	14	34	1.36254e-07	4.06492e-06	Ctss|Ctsk|Gzma|Lgmn|Psmb10|Psma2|Ctsb|Plg|Psma6|Psmb9|Psmb8|Psmb4|Psmb2|Psmb1	http://amigo.geneontology.org/amigo/term/GO:0051603
antigen processing and presentation of exogenous peptide antigen via MHC class II	Gene Ontology	GO:0019886	8	12	6.45594e-07	1.77787e-05	Cd74|H2-DMa|H2-Aa|Ctse|H2-DMb1|H2-Eb1|H2-Ab1|Unc93b1	http://amigo.geneontology.org/amigo/term/GO:0019886
proteolysis	Gene Ontology	GO:0006508	77	549	9.96229e-07	2.5475e-05	Mmp14|C1ra|Lgmn|Adamts2|Ace2|Masp1|Adam8|Cma1|Htra1|Psmb9|Psmb8|Usp22|Psmb4|Psmb2|Psmb1|Folh1|Trhde|Scpep1|Ctsk|Ctsl|Spcs1|Psmb10|Ctsa|Hp|Tmprss4|Ctse|Tpsab1|Plg|Ctsz|Prtn3|Mmp8|Mmp9|Mmp7|Psen2|Ctss|Mmp2|Ggh|Dpep2|Ctsw|Slpi|4930486L24Rik|Mmp10|Gzma|Mmp12|Cpxm1|Cpxm2|Pamr1|Mmp19|Cpe|Psma2|Cpz|Psma6|Ltf|C2|Pdcd6|Myrf|Ctsd|Psmd8|Prss46|Dpep1|Mmp23|C1s1|F5|F7|C1rb|Cpa3|Cfd|Cfi|Cfb|Cops5|Cps1|Habp2|Mm…	http://amigo.geneontology.org/amigo/term/GO:0006508
fatty acid beta-oxidation	Gene Ontology	GO:0006635	12	30	1.57364e-06	3.75576e-05	Hadh|Ehhadh|Eci2|Bdh2|Acox1|Acaa2|Eci1|Abcd3|Abcd2|Hsd17b4|Decr1|Adipoq	http://amigo.geneontology.org/amigo/term/GO:0006635
positive regulation of T cell mediated cytotoxicity	Gene Ontology	GO:0001916	10	21	1.73188e-06	3.87507e-05	H2-K1|H2-D1|Cd1d1|Pnp|H2-Q7|H2-Q10|B2m|Hfe|H2-T23|P2rx7	http://amigo.geneontology.org/amigo/term/GO:0001916
response to oxidative stress	Gene Ontology	GO:0006979	24	104	1.95739e-06	4.12203e-05	Apoe|Idh1|Hmox1|Cygb|Srxn1|Pxdn|Epx|Rcan1|Upk3bl|Prdx1|Gpx1|Gpx3|Gpx4|Gpx7|Mmp9|Mmp2|Atox1|Etfdh|Nqo1|Aldh1a1|Car3|Msrb1|Cst3|Txnrd1	http://amigo.geneontology.org/amigo/term/GO:0006979
toll-like receptor signaling pathway	Gene Ontology	GO:0002224	8	14	3.38077e-06	6.38558e-05	Cd86|Tlr2|Tlr6|Tlr7|Unc93b1|Tlr8|Tlr9|Mapkapk2	http://amigo.geneontology.org/amigo/term/GO:0002224
antigen processing and presentation of peptide or polysaccharide antigen via MHC class II	Gene Ontology	GO:0002504	5	5	3.38899e-06	6.38558e-05	H2-DMa|H2-DMb1|H2-Aa|H2-Eb1|H2-Ab1	http://amigo.geneontology.org/amigo/term/GO:0002504
negative regulation of peptidase activity	Gene Ontology	GO:0010466	25	115	3.836e-06	6.86643e-05	Cd109|Tfpi2|Serpinb6a|Serpina1c|Gpc3|Serpind1|Timp2|Slpi|Papln|Mug1|Timp4|Serpinb1a|Serpina3m|Serpina3k|Timp1|Serpina3n|Birc5|Serpina3c|Pzp|Cst7|Itih1|Cst3|Itih3|Itih5|Itih4	http://amigo.geneontology.org/amigo/term/GO:0010466
antigen processing and presentation of peptide antigen via MHC class I	Gene Ontology	GO:0002474	7	11	5.3924e-06	8.39338e-05	H2-K1|H2-D1|H2-T23|H2-Q10|B2m|Hfe|H2-Q7	http://amigo.geneontology.org/amigo/term/GO:0002474
positive regulation of tumor necrosis factor biosynthetic process	Gene Ontology	GO:0042535	7	11	5.3924e-06	8.39338e-05	Lbp|Hspb1|Tlr2|Ccr2|Spn|Cd209b|Fcgr3	http://amigo.geneontology.org/amigo/term/GO:0042535
complement activation	Gene Ontology	GO:0006956	7	11	5.3924e-06	8.39338e-05	C1s1|C1rb|C1ra|Cfb|Masp1|C3|C2	http://amigo.geneontology.org/amigo/term/GO:0006956
tissue remodeling	Gene Ontology	GO:0048771	6	8	6.6105e-06	9.46624e-05	Mmp14|Lipa|Thbs4|Plg|Mmp9|Mmp2	http://amigo.geneontology.org/amigo/term/GO:0048771
eosinophil chemotaxis	Gene Ontology	GO:0048245	6	8	6.6105e-06	9.46624e-05	Ccl2|Ccl11|Ccl5|Ccr3|Lgals3|Ccl24	http://amigo.geneontology.org/amigo/term/GO:0048245
regulation of cell growth	Gene Ontology	GO:0001558	13	40	8.72677e-06	0.000120161	Mad2l2|Hrasls|Wisp2|Cd44|Lmx1a|Igfbp3|Ctgf|Igfbp6|Igfbp4|Pttg1|Nov|Htra1|Htra3	http://amigo.geneontology.org/amigo/term/GO:0001558
cell adhesion	Gene Ontology	GO:0007155	63	452	1.19542e-05	0.000153913	Hpse|Pcdh8|Cd84|Cyp1b1|Icam1|Fn1|Jam3|Wisp2|Tnfaip6|Selplg|Pdpn|Igsf11|Ctgf|Flot2|Selp|Cadm3|Clstn3|Itgb2|Olr1|Omd|Tnfrsf12a|Cd96|Cd6|Mfap4|Spp1|Vcam1|Cd44|Itgad|Amica1|Thbs2|Emilin2|Cx3cr1|Lyve1|Cpxm1|Svep1|Thbs4|Cpxm2|Col14a1|Cercam|Muc4|Lgals3bp|Fermt3|Itgae|Col6a1|Col6a2|Col6a5|Siglec1|F5|Col8a2|Col8a1|Rnase10|Scarb2|Scarb1|Itgb7|Gpnmb|Parvg|Nid1|Itga11|Mybpc2|Cd22|Lamc2|Tgfbi|Fbln5	http://amigo.geneontology.org/amigo/term/GO:0007155
protein heterotrimerization	Gene Ontology	GO:0070208	7	12	1.20379e-05	0.000153913	C1qtnf1|C1qtnf6|Col1a2|Col1a1|Col6a1|Col6a2|Adipoq	http://amigo.geneontology.org/amigo/term/GO:0070208
very long-chain fatty acid metabolic process	Gene Ontology	GO:0000038	8	16	1.25104e-05	0.000154438	Cyp4f18|Acot5|Hsd17b4|Acox1|Acsbg1|Slc27a5|Abcd2|Acot2	http://amigo.geneontology.org/amigo/term/GO:0000038
leukocyte migration involved in inflammatory response	Gene Ontology	GO:0002523	6	9	1.84713e-05	0.000213314	Ccl2|Itgb2|Jam3|Adam8|S100a9|S100a8	http://amigo.geneontology.org/amigo/term/GO:0002523
phagocytosis, recognition	Gene Ontology	GO:0006910	6	9	1.84713e-05	0.000213314	Sirpa|Clec7a|Scarb1|Cd209b|Fcgr3|Fcgr1	http://amigo.geneontology.org/amigo/term/GO:0006910
positive regulation of angiogenesis	Gene Ontology	GO:0045766	21	96	2.03028e-05	0.000227138	Ccl11|Anxa3|Grem1|Cyp1b1|Vash2|Cx3cr1|Ccl5|C3ar1|Hspb1|Hmox1|Ccl24|Itgb2|Cma1|Ccr3|Mmp9|Pdcd6|Hc|Adm|Cysltr2|Ddah1|C3	http://amigo.geneontology.org/amigo/term/GO:0045766
complement activation, classical pathway	Gene Ontology	GO:0006958	10	27	2.64424e-05	0.00028686	C1s1|Cfi|C1rb|Hc|C1ra|C1qb|C1qa|C8g|C3|C2	http://amigo.geneontology.org/amigo/term/GO:0006958
cholesterol transport	Gene Ontology	GO:0030301	8	18	3.67377e-05	0.000386826	Apob|Scarb1|Gpihbp1|Cftr|Npc2|Npc1|Apoa1|Apoa2	http://amigo.geneontology.org/amigo/term/GO:0030301
complement activation, alternative pathway	Gene Ontology	GO:0006957	6	10	4.30159e-05	0.000439991	Cfh|Cfd|Cfb|C8g|C3|Hc	http://amigo.geneontology.org/amigo/term/GO:0006957
iron ion transport	Gene Ontology	GO:0006826	7	14	4.51448e-05	0.00044894	Slc40a1|Slc11a1|Mfi2|Trf|Ltf|Sfxn1|Fth1	http://amigo.geneontology.org/amigo/term/GO:0006826
response to cytokine stimulus	Gene Ontology	GO:0034097	13	47	5.99382e-05	0.000579942	Acp5|Serpina3k|Il6ra|Serpina3n|Ccl5|Serpina3c|Serpina3m|Serpina1c|Coro1a|Col3a1|Mapkapk2|Aldh1a2|Cxcl16	http://amigo.geneontology.org/amigo/term/GO:0034097
hydrogen peroxide catabolic process	Gene Ontology	GO:0042744	7	15	7.87565e-05	0.00074197	Epx|Prdx1|Gpx1|Gpx3|Gpx4|Pxdn|Txnrd1	http://amigo.geneontology.org/amigo/term/GO:0042744
phagocytosis	Gene Ontology	GO:0006909	11	36	8.16251e-05	0.000749276	Pld4|Anxa3|Cyp1b1|Cebpe|Slc11a1|Irf8|Cdc42se2|Cd302|Coro1c|Coro1a|Axl	http://amigo.geneontology.org/amigo/term/GO:0006909
response to drug	Gene Ontology	GO:0042493	23	121	8.80606e-05	0.000788142	Hadh|Atp1a3|P2rx7|Adra1a|Dpyd|Ei24|Mmp9|Mmp7|Mmp2|Cyp2d26|Pemt|Lcn2|Cyp27b1|Aldh1a1|Abcc2|Ywhaz|Ggh|Serpina7|Lck|Cybb|Npc1|Mgst1|Bche	http://amigo.geneontology.org/amigo/term/GO:0042493
blood coagulation	Gene Ontology	GO:0007596	16	71	0.000132543	0.00111641	F5|F7|F13b|Efemp2|Pros1|Tfpi2|Plg|F2r|Apoh|P2ry12|C3|F13a1|Hrg|Fgg|Serpind1|Fgb	http://amigo.geneontology.org/amigo/term/GO:0007596
hemostasis	Gene Ontology	GO:0007599	12	44	0.000133084	0.00111641	F5|F7|F13b|Pros1|Tfpi2|Plg|F2r|Serpind1|F13a1|Hrg|Fgg|Fgb	http://amigo.geneontology.org/amigo/term/GO:0007599
cholesterol efflux	Gene Ontology	GO:0033344	8	21	0.000137212	0.00111641	Apoe|Apob|Scarb1|Npc2|Npc1|Apoc2|Apoa1|Apoa2	http://amigo.geneontology.org/amigo/term/GO:0033344
long-chain fatty acid metabolic process	Gene Ontology	GO:0001676	8	21	0.000137212	0.00111641	Cpt1a|Cyp4f18|Acsl4|Acsbg1|Slc27a5|Acot5|Acot2|Acot1	http://amigo.geneontology.org/amigo/term/GO:0001676
mitosis	Gene Ontology	GO:0007067	38	256	0.000175986	0.00136824	Ccnb2|Ccnb1|Oip5|Nuf2|Aspm|Cep55|Cdca3|Ccnf|Cdca5|Cdca8|Mad2l2|Tpx2|Nek2|Mis18a|Bub1b|Mastl|Kif18b|Aurka|Aurkb|Zwint|Fam64a|Spc25|Fam83d|Knstrn|Nek6|Ccna2|Cenph|Plk1|Rps6|Cenpw|Pttg1|Nusap1|Cdc25c|Birc5|Anln|Cdc20|Cdk1|Kif2c	http://amigo.geneontology.org/amigo/term/GO:0007067
cell-matrix adhesion	Gene Ontology	GO:0007160	13	52	0.000185261	0.00136824	Hpse|Itgb2|Bcl2l11|Fn1|Sirpa|Jam3|Ctgf|Adam8|Muc4|Nid1|Col3a1|Fgg|Fgb	http://amigo.geneontology.org/amigo/term/GO:0007160
neutrophil chemotaxis	Gene Ontology	GO:0030593	10	33	0.00018557	0.00136824	Ccl2|Cxcl1|Itgb2|Amica1|Spp1|Trem1|S100a8|Lgals3|S100a9|Fcgr3	http://amigo.geneontology.org/amigo/term/GO:0030593
glutathione metabolic process	Gene Ontology	GO:0006749	10	33	0.00018557	0.00136824	Gstt2|Idh1|Gstm5|Gpx1|Gstp2|Gpx3|Mgst1|Gpx4|Txnrd3|Ethe1	http://amigo.geneontology.org/amigo/term/GO:0006749
negative regulation of endopeptidase activity	Gene Ontology	GO:0010951	16	73	0.000187273	0.00136824	Serpina3k|Timp2|Timp1|Serpina7|Serpina3c|Pzp|Serpinb6a|Serpina1c|Serpinf1|Cst3|Serpinb1a|Pttg1|Hrg|Serpina3n|Serpind1|Serpina3m	http://amigo.geneontology.org/amigo/term/GO:0010951
fatty acid metabolic process	Gene Ontology	GO:0006631	25	145	0.00022545	0.00161422	Hadh|Degs1|Acox1|Acsl4|Acaa2|Acsbg1|Ppara|Decr1|Cpt1a|Cryl1|Eci1|C3|Pla2g15|Cyp4a10|Acsm3|Decr2|Acot12|Hsd17b4|Lipa|Acsf2|Cpt2|Alox15|Slc27a5|Ehhadh|Apoa2	http://amigo.geneontology.org/amigo/term/GO:0006631
lipoprotein metabolic process	Gene Ontology	GO:0042157	7	18	0.000313886	0.00220336	Apoe|Apob|Olr1|Mttp|Ppara|Apoa1|Apoa2	http://amigo.geneontology.org/amigo/term/GO:0042157
oligosaccharide biosynthetic process	Gene Ontology	GO:0009312	5	9	0.000323933	0.00223015	St6galnac6|B3galnt1|B3galt2|Mpdu1|B3galt1	http://amigo.geneontology.org/amigo/term/GO:0009312
positive regulation of phagocytosis	Gene Ontology	GO:0050766	9	31	0.000553911	0.00374151	Sirpa|Slc11a1|Clec7a|Pros1|C3|Ahsg|Cd209b|Fcgr3|Fcgr1	http://amigo.geneontology.org/amigo/term/GO:0050766
estrogen metabolic process	Gene Ontology	GO:0008210	5	10	0.00060485	0.00386672	Sult1e1|Hsd17b4|Sult1a1|Comt|Cyp1b1	http://amigo.geneontology.org/amigo/term/GO:0008210
response to molecule of bacterial origin	Gene Ontology	GO:0002237	5	10	0.00060485	0.00386672	Tlr2|Cxcl1|B2m|Tlr9|Cd14	http://amigo.geneontology.org/amigo/term/GO:0002237
nitric oxide biosynthetic process	Gene Ontology	GO:0006809	5	10	0.00060485	0.00386672	Slc7a2|Nos2|Cyp1b1|Ddah1|P2rx4	http://amigo.geneontology.org/amigo/term/GO:0006809
chemokine-mediated signaling pathway	Gene Ontology	GO:0070098	8	26	0.000732202	0.00459874	Ccl2|Cx3cr1|Ackr1|Ccr2|Ccr3|Cxcr6|Cxcr4|Cxcl13	http://amigo.geneontology.org/amigo/term/GO:0070098
leukocyte cell-cell adhesion	Gene Ontology	GO:0007159	7	21	0.000925088	0.00571002	Itgb2|Olr1|Ccl5|Fermt3|Vcam1|Icam1|Selp	http://amigo.geneontology.org/amigo/term/GO:0007159
positive regulation of inflammatory response	Gene Ontology	GO:0050729	10	40	0.00101176	0.00613918	Tlr9|Adora3|Adam8|Tlr2|Ccr2|S100a9|Il33|Ctss|Ccl24|S100a8	http://amigo.geneontology.org/amigo/term/GO:0050729
microglial cell activation	Gene Ontology	GO:0001774	6	16	0.00107433	0.00620339	Tlr2|Tlr6|Tlr7|Clu|Tlr8|Tlr9	http://amigo.geneontology.org/amigo/term/GO:0001774
positive regulation of chemokine production	Gene Ontology	GO:0032722	6	16	0.00107433	0.00620339	Il18|Lbp|Il6ra|Tlr2|Tlr7|Tlr9	http://amigo.geneontology.org/amigo/term/GO:0032722
response to interferon-gamma	Gene Ontology	GO:0034341	6	16	0.00107433	0.00620339	Cyp27b1|Ccl5|Slc11a1|H2-Aa|H2-Eb1|Cxcl16	http://amigo.geneontology.org/amigo/term/GO:0034341
response to hormone stimulus	Gene Ontology	GO:0009725	8	28	0.00126019	0.0070663	Mmp14|Adra1a|Adra1b|Mb|Sord|Ang|Hcls1|Lox	http://amigo.geneontology.org/amigo/term/GO:0009725
regulation of immune response	Gene Ontology	GO:0050776	7	22	0.00126325	0.0070663	Cd1d1|Clec12a|Cd276|Spn|Fcgr3|Fcgr1|Tnfsf13b	http://amigo.geneontology.org/amigo/term/GO:0050776
receptor-mediated endocytosis	Gene Ontology	GO:0006898	12	56	0.0014318	0.00784647	Mrc1|Tfr2|Apoe|Olr1|Cd163|Lgals3bp|Asgr1|Lrp1|Cd300a|Scarb1|Fcgr1|Cxcl16	http://amigo.geneontology.org/amigo/term/GO:0006898
response to lipopolysaccharide	Gene Ontology	GO:0032496	16	87	0.00144656	0.00784647	Cnr1|Lbp|Nos2|Cnr2|Acp5|Slc11a1|Ptger2|Cps1|F2r|Mgst1|Ptafr|Cyp27b1|Cxcl5|Adm|Mapkapk2|P2rx7	http://amigo.geneontology.org/amigo/term/GO:0032496
positive regulation of interferon-gamma biosynthetic process	Gene Ontology	GO:0045078	5	12	0.00165766	0.00885734	Tlr8|Cd276|Tlr7|Cd1d1|Tlr9	http://amigo.geneontology.org/amigo/term/GO:0045078
wound healing	Gene Ontology	GO:0042060	12	57	0.00168305	0.00886077	Hpse|Bnc1|Mmp12|Fn1|Slc11a1|Ppara|Alox15|Col1a1|Col3a1|Lox|Fgf10|Pak1	http://amigo.geneontology.org/amigo/term/GO:0042060
acute-phase response	Gene Ontology	GO:0006953	8	30	0.00205367	0.0105031	Lbp|Fn1|Serpina3n|Hp|Saa1|Itih4|Ahsg|Cd163	http://amigo.geneontology.org/amigo/term/GO:0006953
triglyceride metabolic process	Gene Ontology	GO:0006641	8	30	0.00205367	0.0105031	Cpt1a|Apoe|G6pc|Acsl4|Gpx1|Mttp|Apoh|Cyp2e1	http://amigo.geneontology.org/amigo/term/GO:0006641
cholesterol homeostasis	Gene Ontology	GO:0042632	11	51	0.00211396	0.0106591	Ephx2|Apoe|Apob|Scarb1|Gpihbp1|G6pc|Npc2|Npc1|Mttp|Apoa1|Apoa2	http://amigo.geneontology.org/amigo/term/GO:0042632
xenobiotic metabolic process	Gene Ontology	GO:0006805	6	18	0.00216492	0.0107645	Fmo2|Sult1b1|Cyp1b1|Akr1c13|Sult1a1|Cyp2e1	http://amigo.geneontology.org/amigo/term/GO:0006805
response to zinc ion	Gene Ontology	GO:0010043	5	13	0.002516	0.0120097	Crip1|Hvcn1|Ass1|Ggh|P2rx7	http://amigo.geneontology.org/amigo/term/GO:0010043
organ regeneration	Gene Ontology	GO:0031100	5	13	0.002516	0.0120097	Cdk1|Apoh|Cxcl5|Apoa1|Apoa2	http://amigo.geneontology.org/amigo/term/GO:0031100
ribosomal small subunit biogenesis	Gene Ontology	GO:0042274	5	13	0.002516	0.0120097	Rps7|Rps6|Rps19|Rps16|Rps28	http://amigo.geneontology.org/amigo/term/GO:0042274
defense response to Gram-negative bacterium	Gene Ontology	GO:0050829	7	25	0.00287556	0.0135426	Lbp|Slc11a1|Cd160|Lyz2|Mmp7|Tlr9|Iigp1	http://amigo.geneontology.org/amigo/term/GO:0050829
cytokinesis after mitosis	Gene Ontology	GO:0000281	6	19	0.00295061	0.0135426	Cep55|Nusap1|Plk1|Anln|Racgap1|Ckap2	http://amigo.geneontology.org/amigo/term/GO:0000281
positive regulation vascular endothelial growth factor production	Gene Ontology	GO:0010575	6	19	0.00295061	0.0135426	Hpse|Cyp1b1|C3ar1|Sulf1|C3|Hc	http://amigo.geneontology.org/amigo/term/GO:0010575
positive regulation of cytokine secretion	Gene Ontology	GO:0050715	8	32	0.00319505	0.0144788	Clec5a|Clec4n|AF251705|Tlr2|Cd14|P2rx7|Agtr2|Cd209d	http://amigo.geneontology.org/amigo/term/GO:0050715
positive regulation of MAPK cascade	Gene Ontology	GO:0043410	14	78	0.00353085	0.0158006	Adra1a|Adra1b|Il6ra|Igfbp3|Lpar1|C1qtnf1|Fgf10|F2r|Adrb3|Igfbp4|Lpar3|Cdc42|P2rx7|Timp2	http://amigo.geneontology.org/amigo/term/GO:0043410
response to steroid hormone stimulus	Gene Ontology	GO:0048545	5	14	0.00365617	0.015809	Lox|Adra1b|Spp1|Idh1|Paqr7	http://amigo.geneontology.org/amigo/term/GO:0048545
regulation of actin filament polymerization	Gene Ontology	GO:0030833	5	14	0.00365617	0.015809	Hcls1|Arpc2|Coro1a|Eln|Arpc3	http://amigo.geneontology.org/amigo/term/GO:0030833
cellular iron ion homeostasis	Gene Ontology	GO:0006879	7	26	0.00366521	0.015809	Tfr2|Slc40a1|Slc11a1|Mfi2|Trf|Ltf|Fth1	http://amigo.geneontology.org/amigo/term/GO:0006879
amino acid transport	Gene Ontology	GO:0006865	9	40	0.00389255	0.015993	Slc7a8|Slc3a2|Slc7a10|Slc7a2|Pdpn|Slc6a19|Slc17a5|Slc7a7|Slc43a1	http://amigo.geneontology.org/amigo/term/GO:0006865
positive regulation of cell-substrate adhesion	Gene Ontology	GO:0010811	8	33	0.00392463	0.015993	Hsd17b12|Col8a1|Vit|Nid1|Alox15|Spp1|Spock2|Fbln2	http://amigo.geneontology.org/amigo/term/GO:0010811
positive regulation of interleukin-8 production	Gene Ontology	GO:0032757	6	20	0.00393125	0.015993	Il18|Lbp|Tlr2|Tlr7|Tlr9|Adipoq	http://amigo.geneontology.org/amigo/term/GO:0032757
triglyceride homeostasis	Gene Ontology	GO:0070328	6	20	0.00393125	0.015993	Gpihbp1|Apoa1|Apoc4|Angptl4|Apoc2|Scarb1	http://amigo.geneontology.org/amigo/term/GO:0070328
homeostasis of number of cells within a tissue	Gene Ontology	GO:0048873	6	20	0.00393125	0.015993	Lipa|Col14a1|Cd7|F2r|Coro1a|P2rx7	http://amigo.geneontology.org/amigo/term/GO:0048873
regulation of proteolysis	Gene Ontology	GO:0030162	10	48	0.00433313	0.0174299	Serpina3k|Serpina3m|Serpina3n|Serpina7|Serpina3c|Serpinb6a|Serpina1c|Serpinf1|Serpinb1a|Serpind1	http://amigo.geneontology.org/amigo/term/GO:0030162
cell division	Gene Ontology	GO:0051301	42	344	0.00446947	0.0177786	Ccnb2|Ccnb1|Oip5|Nuf2|Racgap1|Aspm|Cep55|Cdca3|Ccnf|Cdca5|Cdca8|Nek6|Tpx2|Nek2|Mis18a|Bub1b|Mastl|Kif18b|Aurka|Aurkb|Zwint|Fam64a|Gnai2|Spc25|Fam83d|Knstrn|Mad2l2|Ccna2|Plk1|Cks1b|Syce2|Cenpw|Pttg1|Prc1|Nusap1|Cdc25c|Birc5|Anln|Cdc20|Cdk1|Kif2c|Cdc42	http://amigo.geneontology.org/amigo/term/GO:0051301
mitotic sister chromatid segregation	Gene Ontology	GO:0000070	5	15	0.0051241	0.0199768	Plk1|Zwint|Knstrn|Nusap1|Nek2	http://amigo.geneontology.org/amigo/term/GO:0000070
cytolysis	Gene Ontology	GO:0019835	6	21	0.00513371	0.0199768	Gzma|Tsta3|Lyz2|C8g|Hc|P2rx7	http://amigo.geneontology.org/amigo/term/GO:0019835
positive regulation of endothelial cell proliferation	Gene Ontology	GO:0001938	11	57	0.00525468	0.0202277	Ccl2|Bmp6|Ang|Vash2|Ccl11|Arg1|Thbs4|Cyba|Pdcd6|Ccr3|Ccl24	http://amigo.geneontology.org/amigo/term/GO:0001938
response to glucocorticoid stimulus	Gene Ontology	GO:0051384	7	28	0.00572571	0.0212685	Calcr|Sult1a1|Rxra|Bche|Acsbg1|Ass1|Alpl	http://amigo.geneontology.org/amigo/term/GO:0051384
positive regulation of intrinsic apoptotic signaling pathway	Gene Ontology	GO:2001244	7	28	0.00572571	0.0212685	Gnb2l1|Bcl2l11|Ei24|S100a9|S100a8|Clu|Lck	http://amigo.geneontology.org/amigo/term/GO:2001244
collagen fibril organization	Gene Ontology	GO:0030199	8	35	0.0057627	0.0212685	Grem1|Cyp1b1|Adamts2|Col14a1|Col1a2|Col1a1|Col3a1|Lox	http://amigo.geneontology.org/amigo/term/GO:0030199
amino acid transmembrane transport	Gene Ontology	GO:0003333	8	35	0.0057627	0.0212685	Slc7a10|Slc7a8|Slc3a2|Slc7a7|Slc16a2|Slc7a2|Slc6a19|Slc43a1	http://amigo.geneontology.org/amigo/term/GO:0003333
positive regulation of T cell proliferation	Gene Ontology	GO:0042102	10	50	0.00587799	0.0214727	Cd1d1|Ccl5|Pnp|Cd276|Cd86|Coro1a|Vcam1|Spn|Btnl2|Tnfsf13b	http://amigo.geneontology.org/amigo/term/GO:0042102
lipid transport	Gene Ontology	GO:0006869	12	66	0.00599496	0.0216787	Lbp|Apoe|Apob|Gpihbp1|Scarb1|Apoc4|Mttp|Apoc2|Pltp|Apoa1|Apoa2|Osbp2	http://amigo.geneontology.org/amigo/term/GO:0006869
lipid storage	Gene Ontology	GO:0019915	6	22	0.00658514	0.0235748	Acvr1c|Hexa|Hexb|Plin5|Plin2|Apoa1	http://amigo.geneontology.org/amigo/term/GO:0019915
sensory perception of pain	Gene Ontology	GO:0019233	12	67	0.00678107	0.0239753	Cnr1|Cacna1h|Ephx2|Cnr2|Alox5|Ngf|P2rx4|Ccr2|Fam134b|Uchl1|Oprl1|P2rx7	http://amigo.geneontology.org/amigo/term/GO:0019233
ERK1 and ERK2 cascade	Gene Ontology	GO:0070371	5	16	0.0069649	0.0239753	Sox9|Ccl11|Ccr3|Fgf10|Trf	http://amigo.geneontology.org/amigo/term/GO:0070371
peptide cross-linking	Gene Ontology	GO:0018149	5	16	0.0069649	0.0239753	Anxa1|Col3a1|Epb4.2|Fn1|F13a1	http://amigo.geneontology.org/amigo/term/GO:0018149
positive regulation of NF-kappaB import into nucleus	Gene Ontology	GO:0042346	5	16	0.0069649	0.0239753	Tlr2|Il18|Tlr9|Tlr7|Grem1	http://amigo.geneontology.org/amigo/term/GO:0042346
brown fat cell differentiation	Gene Ontology	GO:0050873	7	29	0.00703245	0.0239773	Mb|Plac8|Mrap|Pex11a|Adrb3|Ebf2|Adipoq	http://amigo.geneontology.org/amigo/term/GO:0050873
protein homotrimerization	Gene Ontology	GO:0070207	6	23	0.00831252	0.0280744	Alox5ap|Lcn2|Arg1|Mgst1|Tnfrsf9|Nell2	http://amigo.geneontology.org/amigo/term/GO:0070207
extracellular matrix organization	Gene Ontology	GO:0030198	14	86	0.00859306	0.0287506	Hsd17b12|Crispld2|Eln|Spock2|Fn1|Prdx4|Nid1|Sox9|Pxdn|Vit|Mmp9|Lgals3|Tgfbi|Fbln5	http://amigo.geneontology.org/amigo/term/GO:0030198
positive regulation of leukocyte migration	Gene Ontology	GO:0002687	5	17	0.00922198	0.0302887	Tlr2|Ccl2|Adora3|Selp|Mmp9	http://amigo.geneontology.org/amigo/term/GO:0002687
regulation of glucose metabolic process	Gene Ontology	GO:0010906	5	17	0.00922198	0.0302887	Igfbp3|C1qtnf1|Pdk4|Igfbp4|Adipoq	http://amigo.geneontology.org/amigo/term/GO:0010906
defense response to bacterium	Gene Ontology	GO:0042742	17	115	0.0106369	0.0346182	Lbp|Anxa3|Cebpe|Slc11a1|Plac8|Hp|Irf8|H2-K1|Nos2|Lyz2|Fcgr1|Defb36|Prg2|Spn|Mmp7|Cxcl13|Cd209d	http://amigo.geneontology.org/amigo/term/GO:0042742
cellular response to lipopolysaccharide	Gene Ontology	GO:0071222	10	55	0.01162	0.037477	Ccl2|Lbp|Nos2|Tnfrsf1b|Gbp2|Cmpk2|Irf8|Cd14|Cd300lb|Axl	http://amigo.geneontology.org/amigo/term/GO:0071222
protein polymerization	Gene Ontology	GO:0051258	6	25	0.0127003	0.0402363	Tuba1c|Tubb4b|Tubb5|Fgg|Tubb2a|Fgb	http://amigo.geneontology.org/amigo/term/GO:0051258
acyl-CoA metabolic process	Gene Ontology	GO:0006637	6	25	0.0127003	0.0402363	Ehhadh|Acot12|Acot5|Acot2|Ces1d|Acot1	http://amigo.geneontology.org/amigo/term/GO:0006637
negative regulation of angiogenesis	Gene Ontology	GO:0016525	10	56	0.0131536	0.0413068	Ccl2|Hhex|Cx3cr1|Thbs2|Sulf1|Plg|Ccr2|Serpinf1|Apoh|Hrg	http://amigo.geneontology.org/amigo/term/GO:0016525
positive regulation of apoptotic process	Gene Ontology	GO:0043065	32	265	0.0139681	0.0434834	Cyp1b1|Acvr1c|Psen2|Arl6ip5|Melk|Clu|Pmaip1|Lpar1|Tnfrsf12a|P2rx7|Anxa1|Klf11|Adm|Tsc22d1|Eef1a2|Bak1|Ubd|Mmp9|Mmp2|Wnt10b|Net1|Bcl2l11|Gzma|Sfrp4|Gnb2l1|Rps6|Aldh1a1|Aldh1a2|Cnr1|Igfbp3|Rxra|Trp53inp1	http://amigo.geneontology.org/amigo/term/GO:0043065
defense response to protozoan	Gene Ontology	GO:0042832	5	19	0.0151454	0.0463423	Irf4|Irf8|Gbp2|Iigp1|Slc11a1	http://amigo.geneontology.org/amigo/term/GO:0042832
gluconeogenesis	Gene Ontology	GO:0006094	5	19	0.0151454	0.0463423	Rbp4|Gpd1|Pcx|Pck1|G6pc	http://amigo.geneontology.org/amigo/term/GO:0006094
platelet activation	Gene Ontology	GO:0030168	6	26	0.0154108	0.0467548	Entpd1|P2ry12|F2r|Fgb|Fgg|Axl	http://amigo.geneontology.org/amigo/term/GO:0030168
cell redox homeostasis	Gene Ontology	GO:0045454	10	58	0.0166697	0.0501492	Apex1|2700094K13Rik|Qsox1|Sepw1|Sh3bgrl3|Prdx4|Gpx1|Glrx|Txnrd3|Txnrd1	http://amigo.geneontology.org/amigo/term/GO:0045454
steroid metabolic process	Gene Ontology	GO:0008202	12	76	0.0180491	0.0538465	Sult1b1|Hmgcs2|Apob|Sult4a1|G6pc|Sult1a1|Cyp2e1|Npc2|Npc1|Mttp|Cyp1b1|Apoa1	http://amigo.geneontology.org/amigo/term/GO:0008202
osteoclast differentiation	Gene Ontology	GO:0030316	6	27	0.0184969	0.0547265	Snx10|Calcr|Gab2|Trf|Cd300lf|Gpc3	http://amigo.geneontology.org/amigo/term/GO:0030316
positive regulation of ERK1 and ERK2 cascade	Gene Ontology	GO:0070374	15	104	0.019464	0.0566836	Adra1a|Cd74|Fgg|Glipr2|Cd44|Alox15|F2r|Ctgf|Fgb|Icam1|C3|Fgf10|Cysltr2|Ffar4|Bmper	http://amigo.geneontology.org/amigo/term/GO:0070374
negative regulation of inflammatory response	Gene Ontology	GO:0050728	11	68	0.0194751	0.0566836	Acp5|Apoe|Tnfrsf1b|Tnfaip8l2|Cd276|Ffar4|Cnr2|Serpinf1|Adipoq|Apoa1|Pbk	http://amigo.geneontology.org/amigo/term/GO:0050728
integrin-mediated signaling pathway	Gene Ontology	GO:0007229	12	77	0.019866	0.0569201	Itgb2|Itgb7|Nme2|Tyrobp|Gab2|Adam8|Ctgf|Itga11|Eif6|Col3a1|Itgad|Itgae	http://amigo.geneontology.org/amigo/term/GO:0007229
negative regulation of smooth muscle cell proliferation	Gene Ontology	GO:0048662	7	35	0.0198743	0.0569201	Apod|Ang|Hmox1|Comt|Igfbp3|Ctnnbip1|Adipoq	http://amigo.geneontology.org/amigo/term/GO:0048662
cellular response to starvation	Gene Ontology	GO:0009267	6	28	0.02198	0.0614753	Wnt2b|Rnase4|Alb|Angptl4|Pdk4|5330417C22Rik	http://amigo.geneontology.org/amigo/term/GO:0009267
aging	Gene Ontology	GO:0007568	6	28	0.02198	0.0614753	Cnr1|Adra1a|Apoe|Apex1|Cyp27b1|Ifi27l2a	http://amigo.geneontology.org/amigo/term/GO:0007568
G2/M transition of mitotic cell cycle	Gene Ontology	GO:0000086	6	28	0.02198	0.0614753	Plk1|Birc5|Mastl|Cdc25c|Cdkn1a|Wnt10b	http://amigo.geneontology.org/amigo/term/GO:0000086
response to insulin stimulus	Gene Ontology	GO:0032868	7	36	0.0230069	0.0633475	Pck1|Acvr1c|Retn|Rbp4|Cyp27b1|Ppara|Ggh	http://amigo.geneontology.org/amigo/term/GO:0032868
vasodilation	Gene Ontology	GO:0042311	5	21	0.0231802	0.0633475	Gpx1|Bdkrb2|Apoe|Cftr|P2rx4	http://amigo.geneontology.org/amigo/term/GO:0042311
positive regulation of branching involved in ureteric bud morphogenesis	Gene Ontology	GO:0090190	5	21	0.0231802	0.0633475	Wnt2b|Agtr2|Sox8|Sox9|Grem1	http://amigo.geneontology.org/amigo/term/GO:0090190
activation of cysteine-type endopeptidase activity involved in apoptotic process	Gene Ontology	GO:0006919	11	70	0.0237579	0.0644343	Bcl2l11|Pdcd6|Bak1|Gnb2l1|F2r|S100a9|S100a8|Pmaip1|Dap|Xdh|Lck	http://amigo.geneontology.org/amigo/term/GO:0006919
embryo implantation	Gene Ontology	GO:0007566	6	29	0.0258794	0.0691683	Mug1|Rxra|Pzp|Mmp9|Grn|Mmp2	http://amigo.geneontology.org/amigo/term/GO:0007566
positive regulation of interleukin-6 production	Gene Ontology	GO:0032755	8	45	0.0258898	0.0691683	Lbp|Il6ra|Tlr2|Il33|Tlr9|Il1f6|P2rx7|Tlr7	http://amigo.geneontology.org/amigo/term/GO:0032755
protein localization in plasma membrane	Gene Ontology	GO:0072659	7	37	0.0264638	0.0701781	Rab34|Epb4.1l3|Calcr|Ramp1|Ramp3|Scn3b|Adipoq	http://amigo.geneontology.org/amigo/term/GO:0072659
lipid catabolic process	Gene Ontology	GO:0016042	14	99	0.0273489	0.0719919	Pld4|Lipa|Pla2g16|Daglb|Apob|Hrasls|Enpp6|Plcxd3|Enpp2|Pla2g7|Pla2g5|Apoc2|Ces1d|Plin1	http://amigo.geneontology.org/amigo/term/GO:0016042
skeletal system development	Gene Ontology	GO:0001501	13	90	0.0280357	0.0727963	Fgfrl1|Vdr|Gdf3|Hexb|Fbn1|Hexa|Sox9|Col1a2|Mmp9|Lgals3|Clec3b|Col1a1|Rassf2	http://amigo.geneontology.org/amigo/term/GO:0001501
negative regulation of DNA binding	Gene Ontology	GO:0043392	5	22	0.0280611	0.0727963	Hmox1|Nek2|Id2|Gzma|Ctnnbip1	http://amigo.geneontology.org/amigo/term/GO:0043392
protein oligomerization	Gene Ontology	GO:0051259	8	46	0.0292026	0.0752125	Grhpr|Nme2|Gjb1|C1qtnf6|Chp1|Hacl1|Mmp9|P2rx7	http://amigo.geneontology.org/amigo/term/GO:0051259
nucleic acid phosphodiester bond hydrolysis	Gene Ontology	GO:0090305	6	30	0.0302123	0.0767092	Nme1|Trex1|Enpp2|Apex1|Rps3|Fen1	http://amigo.geneontology.org/amigo/term/GO:0090305
response to hydrogen peroxide	Gene Ontology	GO:0042542	6	30	0.0302123	0.0767092	Mb|Hp|Hmox1|Gpx1|Mmp2|Lck	http://amigo.geneontology.org/amigo/term/GO:0042542
sodium ion transmembrane transport	Gene Ontology	GO:0035725	11	73	0.0314116	0.0791927	Slc6a3|Slc13a1|Slc6a8|Hcn4|Asic2|Slc4a4|Slc34a3|Slc34a2|Atp1a3|Scn3b|Slc5a2	http://amigo.geneontology.org/amigo/term/GO:0035725
defense response to Gram-positive bacterium	Gene Ontology	GO:0050830	8	47	0.0327961	0.082105	Lbp|Acp5|Gbp2|Tlr2|Lyz2|Mmp7|P2rx7|Hist1h2bk	http://amigo.geneontology.org/amigo/term/GO:0050830
positive regulation of axon extension	Gene Ontology	GO:0045773	5	23	0.0335469	0.0834012	Ngf|Apoe|Tnfrsf12a|Islr2|Fn1	http://amigo.geneontology.org/amigo/term/GO:0045773
protein complex assembly	Gene Ontology	GO:0006461	9	56	0.0340736	0.0841265	Cd74|Ccnb1|H2-DMa|Cdk1|Mgp|Ahsg|Spp2|Sox9|Cd3d	http://amigo.geneontology.org/amigo/term/GO:0006461
positive regulation of cell death	Gene Ontology	GO:0010942	7	39	0.0344019	0.0843554	Bcl2l11|Hp|Ctgf|Ucp2|Lpar1|Cysltr2|Txnrd1	http://amigo.geneontology.org/amigo/term/GO:0010942
response to toxin	Gene Ontology	GO:0009636	8	48	0.0366792	0.0893275	Ephx2|Cyp2f2|Ccl5|Ces1d|Gpx1|Glyat|Cyp1b1|Ttpa	http://amigo.geneontology.org/amigo/term/GO:0009636
placenta development	Gene Ontology	GO:0001890	7	40	0.0389054	0.0934773	Gjb3|Rxra|Dnmt3l|Rps6|Ccnf|Etnk2|Ttpa	http://amigo.geneontology.org/amigo/term/GO:0001890
cell growth	Gene Ontology	GO:0016049	7	40	0.0389054	0.0934773	Il7r|Adra1a|Adra1b|Il6ra|Lefty1|Emp3|Emp1	http://amigo.geneontology.org/amigo/term/GO:0016049
negative regulation of fibroblast proliferation	Gene Ontology	GO:0048147	5	24	0.0396533	0.0946392	Agtr2|Cd300a|Pmaip1|Fth1|Mmp9	http://amigo.geneontology.org/amigo/term/GO:0048147
cellular response to hydrogen peroxide	Gene Ontology	GO:0070301	6	32	0.0402362	0.0953945	Anxa1|Lcn2|Apex1|Net1|Fabp1|Axl	http://amigo.geneontology.org/amigo/term/GO:0070301
positive regulation of neuron projection development	Gene Ontology	GO:0010976	11	76	0.0406739	0.0956066	Cnr1|Ngf|Cxcl5|Dpysl3|Nme2|Stmn2|Fez1|Camk1|Serpinf1|Grn|Nme1	http://amigo.geneontology.org/amigo/term/GO:0010976
positive regulation of phosphatidylinositol 3-kinase cascade	Gene Ontology	GO:0014068	8	49	0.0408598	0.0956066	Ccl5|Adora3|Hcls1|F2r|Sox9|Hcst|Myoc|Selp	http://amigo.geneontology.org/amigo/term/GO:0014068
protein processing	Gene Ontology	GO:0016485	7	41	0.0437776	0.101112	Ctsl|Adamts2|Psen2|Cpe|Cpz|Srgn|P2rx7	http://amigo.geneontology.org/amigo/term/GO:0016485
positive regulation of tumor necrosis factor production	Gene Ontology	GO:0032760	7	41	0.0437776	0.101112	Il18|Lbp|Clec7a|Tlr2|Cd14|Clu|Tlr9	http://amigo.geneontology.org/amigo/term/GO:0032760
cell morphogenesis	Gene Ontology	GO:0000902	10	68	0.0451606	0.103638	Il7r|Lipa|Grem1|Psmb10|Epb4.2|Pdpn|Vdr|Adam8|Clu|P2rx7	http://amigo.geneontology.org/amigo/term/GO:0000902
apoptotic signaling pathway	Gene Ontology	GO:0097190	6	33	0.0459499	0.103801	Tm2d1|Vdr|Bak1|Dap|Spn|P2rx4	http://amigo.geneontology.org/amigo/term/GO:0097190
response to peptide hormone stimulus	Gene Ontology	GO:0043434	6	33	0.0459499	0.103801	Serpina3k|Serpina3m|Serpina3n|Serpina1c|Serpina3c|Gatm	http://amigo.geneontology.org/amigo/term/GO:0043434
positive regulation of Wnt receptor signaling pathway	Gene Ontology	GO:0030177	5	25	0.0463916	0.103801	Tlr2|Rspo1|Hhex|Fgf10|Sulf1	http://amigo.geneontology.org/amigo/term/GO:0030177
T cell homeostasis	Gene Ontology	GO:0043029	5	25	0.0463916	0.103801	Bcl2l11|Ccnb2|Coro1a|Pmaip1|P2rx7	http://amigo.geneontology.org/amigo/term/GO:0043029
glucose metabolic process	Gene Ontology	GO:0006006	9	60	0.0500373	0.111263	Cpt1a|Apod|Pck1|Dcxr|H6pd|Fabp5|Pdk4|Ppara|Adipoq	http://amigo.geneontology.org/amigo/term/GO:0006006
regulation of cell shape	Gene Ontology	GO:0008360	13	98	0.0509725	0.111778	Ccl2|Ccl11|Epb4.2|Fn1|Epb4.1l3|Hexb|Cdc42se2|Rhou|Coro1a|Pdpn|Icam1|Gas2|Ccl24	http://amigo.geneontology.org/amigo/term/GO:0008360
lung development	Gene Ontology	GO:0030324	13	98	0.0509725	0.111778	Mmp14|Lipa|Adamts2|Ctgf|Pdpn|Mgp|Sparc|Gpc3|Rbp4|Lox|Fgf10|Cftr|Aldh1a2	http://amigo.geneontology.org/amigo/term/GO:0030324
cholesterol metabolic process	Gene Ontology	GO:0008203	11	79	0.0516742	0.111778	Hmgcs2|Apoe|Apob|Saa1|Npc2|Npc1|Mttp|Fech|Lrp1|Apoa1|Apoa2	http://amigo.geneontology.org/amigo/term/GO:0008203
cellular response to organic cyclic compound	Gene Ontology	GO:0071407	6	34	0.0521423	0.111778	Il18|Cyp1b1|Ccl5|Slc16a1|Wnt10b|Alpl	http://amigo.geneontology.org/amigo/term/GO:0071407
negative regulation of protein binding	Gene Ontology	GO:0032091	6	34	0.0521423	0.111778	Slpi|Psen2|Ctnnbip1|Aurka|Aurkb|Ppara	http://amigo.geneontology.org/amigo/term/GO:0032091
growth	Gene Ontology	GO:0040007	6	34	0.0521423	0.111778	Sepp1|Ccnb2|Bmp6|Gdf3|Gdf5|Lefty1	http://amigo.geneontology.org/amigo/term/GO:0040007
chromosome segregation	Gene Ontology	GO:0007059	10	70	0.0533987	0.113229	Nek6|Knstrn|Nek2|Mis18a|Cenph|Birc5|Kif2c|Cenpw|Pttg1|Spc25	http://amigo.geneontology.org/amigo/term/GO:0007059
response to bacterium	Gene Ontology	GO:0009617	5	26	0.0537679	0.113229	Tlr2|Irf8|Fcgr1|P2rx7|Slc11a1	http://amigo.geneontology.org/amigo/term/GO:0009617
lipopolysaccharide-mediated signaling pathway	Gene Ontology	GO:0031663	5	26	0.0537679	0.113229	Il18|Lbp|Scarb1|Ptafr|Ccl5	http://amigo.geneontology.org/amigo/term/GO:0031663
elevation of cytosolic calcium ion concentration	Gene Ontology	GO:0007204	14	109	0.0552023	0.114341	Cxcl1|Adra1a|Bdkrb2|Ccl28|C3ar1|Calcr|C1qtnf1|F2r|Adra1b|Fkbp1b|Nmb|Cxcl13|Adm|Oprl1	http://amigo.geneontology.org/amigo/term/GO:0007204
response to virus	Gene Ontology	GO:0009615	8	52	0.0552543	0.114341	Clec5a|Lcn2|Oasl1|Tlr13|Ace2|Ifi27l2a|Tlr9|Tlr8	http://amigo.geneontology.org/amigo/term/GO:0009615
DNA damage response, signal transduction resulting in induction of apoptosis	Gene Ontology	GO:0008630	8	52	0.0552543	0.114341	Bcl2l11|Pnp|Hmox1|Bak1|Ei24|Pmaip1|Tnfrsf1b|Crip1	http://amigo.geneontology.org/amigo/term/GO:0008630
ossification	Gene Ontology	GO:0001503	11	80	0.0557459	0.114696	Mmp14|Bmp6|Rassf2|Alox15|Tmem119|Ctgf|Mgp|Spp1|Ltf|Mmp9|Ahsg	http://amigo.geneontology.org/amigo/term/GO:0001503
positive regulation of vasoconstriction	Gene Ontology	GO:0045907	6	35	0.0588184	0.120326	Adra1a|Alox5|F2r|Icam1|Fgg|Fgb	http://amigo.geneontology.org/amigo/term/GO:0045907
protein glycosylation	Gene Ontology	GO:0006486	9	62	0.0596046	0.121241	B3galt1|B3galnt1|B3galt2|B3gnt8|B3gnt9|Npc1|Fut2|St6galnac6|St6galnac4	http://amigo.geneontology.org/amigo/term/GO:0006486
one-carbon metabolic process	Gene Ontology	GO:0006730	5	27	0.0617841	0.122203	Car3|Car9|Car13|Mat1a|Car5b	http://amigo.geneontology.org/amigo/term/GO:0006730
positive regulation of mitotic cell cycle	Gene Ontology	GO:0045931	5	27	0.0617841	0.122203	Cdk1|Ccnb1|Fgf10|Birc5|Usp22	http://amigo.geneontology.org/amigo/term/GO:0045931
positive regulation of protein secretion	Gene Ontology	GO:0050714	5	27	0.0617841	0.122203	P2rx7|Ang|Fgg|Fgb|Kcnn4	http://amigo.geneontology.org/amigo/term/GO:0050714
positive regulation of vasodilation	Gene Ontology	GO:0045909	5	27	0.0617841	0.122203	Agtr2|Nos2|Adm|Cps1|Cftr	http://amigo.geneontology.org/amigo/term/GO:0045909
nucleotide metabolic process	Gene Ontology	GO:0009117	5	27	0.0617841	0.122203	Nme4|Dnph1|Nme2|Nme1|Nt5c1a	http://amigo.geneontology.org/amigo/term/GO:0009117
sodium ion transport	Gene Ontology	GO:0006814	14	111	0.0625065	0.122952	Slc20a2|Nalcn|Slc13a1|Slc6a8|Hcn4|Chp2|Slc5a12|Slc4a4|Slc5a2|Slc34a2|Atp1a3|Slc34a3|Asic2|Scn3b	http://amigo.geneontology.org/amigo/term/GO:0006814
cell chemotaxis	Gene Ontology	GO:0060326	6	36	0.0659808	0.129077	Ccl6|Ccl28|Vcam1|Cxcl11|Cxcl5|Cxcl16	http://amigo.geneontology.org/amigo/term/GO:0060326
actin filament organization	Gene Ontology	GO:0007015	7	45	0.0670831	0.13052	Mad2l2|Ccl11|Sirpa|Trf|Coro1a|Was|Cdc42	http://amigo.geneontology.org/amigo/term/GO:0007015
receptor internalization	Gene Ontology	GO:0031623	5	28	0.0704371	0.134848	Calcr|Adm|Ramp1|Rab31|Ramp3	http://amigo.geneontology.org/amigo/term/GO:0031623
bone mineralization	Gene Ontology	GO:0030282	5	28	0.0704371	0.134848	Clec3b|Gla|Gpc3|Klf10|Alox15	http://amigo.geneontology.org/amigo/term/GO:0030282
positive regulation of bone mineralization	Gene Ontology	GO:0030501	5	28	0.0704371	0.134848	Bmp6|Wnt10b|Cd276|Atraid|P2rx7	http://amigo.geneontology.org/amigo/term/GO:0030501
ion transport	Gene Ontology	GO:0006811	55	561	0.0744317	0.141061	Slc20a2|Tmc5|Ccdc109b|Mfi2|Hcn4|Slc5a12|Atp1a3|Asic2|P2rx4|Scn3b|P2rx6|Clic6|Clic1|Slc11a1|Gabrp|Atp12a|Racgap1|Cacna1h|P2rx7|Sfxn1|Steap1|Kcna7|Atp6v1b2|Steap4|Slc39a7|Slc40a1|Atox1|Lcn2|Hvcn1|Kcnab2|Slc34a3|Slc34a2|Fam26f|Ltf|Chrna2|Htr3a|Trpv5|Gabra4|Trf|Cftr|Gabra3|Fxyd6|Cp|Kcnj15|Nalcn|Slc13a1|Slc6a8|Kcnk13|Cybb|Slc4a4|Slc5a2|Kcnn4|Slc39a1|Slc30a2|Kcnip2	http://amigo.geneontology.org/amigo/term/GO:0006811
positive regulation of gene expression	Gene Ontology	GO:0010628	22	197	0.0744707	0.141061	Il18|Ngf|Id2|Ctgf|Ephx2|C1qtnf1|Lck|Il7r|Vdr|Sfrp4|Ccl5|Sox8|Sox9|Aldh1a2|Lcn2|Cebpe|Cd44|Slc11a1|Vim|Cdk1|Il33|Cdc42	http://amigo.geneontology.org/amigo/term/GO:0010628
carbohydrate metabolic process	Gene Ontology	GO:0005975	21	187	0.0763716	0.1439	Hpse|Npl|Chst12|Hhipl1|Klb|Man2b1|Slc3a2|Gla|Hexb|H6pd|AI464131|Pklr|Hexa|Gpd1|Fut2|Pdk4|Dcxr|Man2b2|Fuca1|Chil3|Gusb	http://amigo.geneontology.org/amigo/term/GO:0005975
positive regulation of smooth muscle cell migration	Gene Ontology	GO:0014911	5	29	0.07972	0.149423	Il18|Cyp1b1|P2ry6|Retn|Ccl5	http://amigo.geneontology.org/amigo/term/GO:0014911
cellular response to amino acid stimulus	Gene Ontology	GO:0071230	6	38	0.0817613	0.152199	Col1a2|Col1a1|Col6a1|Col3a1|Mmp2|Mmp3	http://amigo.geneontology.org/amigo/term/GO:0071230
positive regulation of epithelial cell proliferation	Gene Ontology	GO:0050679	9	66	0.0820516	0.152199	Bmp6|Bnc1|Nme1|Nme2|Ccl5|Sox9|Grn|Fgf10|Htra1	http://amigo.geneontology.org/amigo/term/GO:0050679
positive regulation of catalytic activity	Gene Ontology	GO:0043085	7	48	0.0886516	0.163594	Apoe|Timp2|Psen2|Dnmt3l|Igfbp3|P2rx7|Apoa2	http://amigo.geneontology.org/amigo/term/GO:0043085
protein tetramerization	Gene Ontology	GO:0051262	5	30	0.0896215	0.164536	Trpv5|Rps19|Ccl5|Mat1a|Txnrd1	http://amigo.geneontology.org/amigo/term/GO:0051262
extrinsic apoptotic signaling pathway	Gene Ontology	GO:0097191	6	39	0.090372	0.165067	G0s2|Tnfrsf1b|Sgpp1|Il33|Tnfrsf12a|P2rx7	http://amigo.geneontology.org/amigo/term/GO:0097191
positive regulation of protein kinase B signaling cascade	Gene Ontology	GO:0051897	9	68	0.0949523	0.171681	Hpse|F7|C1qtnf1|Adam8|Gpx1|Hcls1|Myoc|AI464131|Axl	http://amigo.geneontology.org/amigo/term/GO:0051897
regulation of growth	Gene Ontology	GO:0040008	9	68	0.0949523	0.171681	Creg1|Socs3|Igsf11|Gnb2l1|Igfbp3|Gpc3|Igfbp4|Armc10|Nell2	http://amigo.geneontology.org/amigo/term/GO:0040008
male gonad development	Gene Ontology	GO:0008584	8	59	0.100115	0.174856	Insl6|Bcl2l11|Rnase10|Prdx4|Sox8|Sox9|Rbp4|Ahsg	http://amigo.geneontology.org/amigo/term/GO:0008584
cellular response to cAMP	Gene Ontology	GO:0071320	5	31	0.100127	0.174856	Wnt10b|Gpd1|Hcn4|Adipoq|Cftr	http://amigo.geneontology.org/amigo/term/GO:0071320
positive regulation of nitric oxide biosynthetic process	Gene Ontology	GO:0045429	5	31	0.100127	0.174856	Tlr2|Clu|Itgb2|Ddah1|Icam1	http://amigo.geneontology.org/amigo/term/GO:0045429
response to organic cyclic compound	Gene Ontology	GO:0014070	5	31	0.100127	0.174856	Cd83|Hrg|Idh1|P2rx7|Atp12a	http://amigo.geneontology.org/amigo/term/GO:0014070
negative regulation of blood pressure	Gene Ontology	GO:0045776	5	31	0.100127	0.174856	Cnr1|Nos2|Bdkrb2|Adipoq|Ppara	http://amigo.geneontology.org/amigo/term/GO:0045776
regulation of cyclin-dependent protein kinase activity	Gene Ontology	GO:0000079	5	31	0.100127	0.174856	Cdkn2c|Cdkn1a|Ccna2|Ccnb1|Ccnb2	http://amigo.geneontology.org/amigo/term/GO:0000079
positive regulation of fat cell differentiation	Gene Ontology	GO:0045600	5	31	0.100127	0.174856	Id2|Medag|Cmklr1|Dkkl1|Adig	http://amigo.geneontology.org/amigo/term/GO:0045600
cell-cell adhesion	Gene Ontology	GO:0016337	11	90	0.108193	0.188025	Cd53|Itgb2|Clec7a|Vnn1|Pdpn|Adam8|Sox9|Vcam1|Icam1|Selp|Cdc42	http://amigo.geneontology.org/amigo/term/GO:0016337
cell cycle	Gene Ontology	GO:0007049	56	590	0.112454	0.194487	Ccnb2|Ccnb1|Oip5|Nuf2|Racgap1|Aspm|Cep55|Cdca3|Ccnf|Cdca5|Cdkn2c|Cdca8|Usp22|Mad2l2|Tpx2|Nek2|Mis18a|Cenpw|Bub1b|Mastl|Kif18b|Plk1|Cdkn3|Aurka|Aurkb|Zwint|Fam64a|Gnai2|Spc25|Fam83d|Knstrn|Nek6|Ccna2|Camk1|Cdkn1a|Rassf2|Cks1b|Gnb2l1|Syce2|Mapk4|Ckap2|Pttg1|Prc1|Erh|Nusap1|Melk|Cdc25c|Birc5|Anln|Cdc20|Cdk1|Chaf1b|Kif2c|Gas2|Fanci|Cdc42	http://amigo.geneontology.org/amigo/term/GO:0007049
positive regulation of proteasomal ubiquitin-dependent protein catabolic process	Gene Ontology	GO:0032436	6	42	0.118994	0.204277	Plk1|Psen2|Gnb2l1|Il33|Clu|Aurka	http://amigo.geneontology.org/amigo/term/GO:0032436
angiogenesis	Gene Ontology	GO:0001525	21	198	0.119257	0.204277	Il18|Ccl2|Col8a1|Ang|Cyp1b1|Fn1|Jam3|Hmox1|Tnfrsf12a|Ramp1|Mmp19|Adam8|Col8a2|Ctgf|Angptl4|Grem1|Pdcd6|Hrg|Mmp2|Cxcl17|Ccr2	http://amigo.geneontology.org/amigo/term/GO:0001525
regulation of blood pressure	Gene Ontology	GO:0008217	7	52	0.122774	0.208476	Cyp4f18|C3ar1|Hmox1|Gucy1a3|Cyba|Col1a2|P2rx4	http://amigo.geneontology.org/amigo/term/GO:0008217
heterophilic cell-cell adhesion	Gene Ontology	GO:0007157	5	33	0.122873	0.208476	Amica1|Selp|Vcam1|Lgals1|Cadm3	http://amigo.geneontology.org/amigo/term/GO:0007157
positive regulation of smooth muscle cell proliferation	Gene Ontology	GO:0048661	8	62	0.12417	0.209684	Il18|Il6ra|Ccl5|C3ar1|Hmox1|Id2|Retn|Cyba	http://amigo.geneontology.org/amigo/term/GO:0048661
negative regulation of cell death	Gene Ontology	GO:0060548	7	53	0.132222	0.222233	Ccl5|Ctsb|Npc1|Ctgf|Mgmt|Cst3|Ttpa	http://amigo.geneontology.org/amigo/term/GO:0060548
response to ethanol	Gene Ontology	GO:0045471	5	34	0.135068	0.225954	Slc6a3|Cdk1|Cnr1|Aldh1a1|Ggh	http://amigo.geneontology.org/amigo/term/GO:0045471
osteoblast differentiation	Gene Ontology	GO:0001649	10	84	0.137959	0.229717	Bmp6|Col6a1|Gnb2l1|Tmem119|Sox8|Itga11|Spp1|Myoc|Hsd17b4|Alpl	http://amigo.geneontology.org/amigo/term/GO:0001649
phospholipid biosynthetic process	Gene Ontology	GO:0008654	7	54	0.142019	0.235383	Pla2g16|Pemt|Serinc5|Hexb|Mboat1|Etnk2|Agpat9	http://amigo.geneontology.org/amigo/term/GO:0008654
positive regulation of actin filament polymerization	Gene Ontology	GO:0030838	5	35	0.147776	0.242678	Ccl11|Alox15|Ccl24|Icam1|Arpc2	http://amigo.geneontology.org/amigo/term/GO:0030838
extrinsic apoptotic signaling pathway in absence of ligand	Gene Ontology	GO:0097192	5	35	0.147776	0.242678	Erbb3|Ngf|Lcn2|Bcl2l11|Bak1	http://amigo.geneontology.org/amigo/term/GO:0097192
microtubule-based movement	Gene Ontology	GO:0007018	7	55	0.152153	0.248726	Kif1a|Kif4|Kif19a|Kif22|Kif18b|Kif2c|Kif20a	http://amigo.geneontology.org/amigo/term/GO:0007018
negative regulation of gene expression	Gene Ontology	GO:0010629	12	107	0.153039	0.249036	Ccnb1|Nme1|Ctgf|Cdkn1a|Id2|Rxra|Bak1|Sfmbt2|Serpinf1|Xdh|Nos2|Cdc42	http://amigo.geneontology.org/amigo/term/GO:0010629
positive regulation of NF-kappaB transcription factor activity	Gene Ontology	GO:0051092	11	97	0.157612	0.254885	Itgb2|Rps3|Adam8|Card14|Tlr2|Grem1|Psma6|Ltf|Icam1|Clu|Tlr9	http://amigo.geneontology.org/amigo/term/GO:0051092
positive regulation of cell migration	Gene Ontology	GO:0030335	15	140	0.158057	0.254885	Mmp14|Ccl11|Fn1|Ccl5|C3ar1|Tnfaip6|Pdpn|Gnb2l1|F2r|Coro1a|Col1a1|Myoc|Mmp2|Ccl24|Cxcl16	http://amigo.geneontology.org/amigo/term/GO:0030335
blood vessel remodeling	Gene Ontology	GO:0001974	5	36	0.160969	0.258151	Ccr2|Fgf10|Adra1b|Axl|Bak1	http://amigo.geneontology.org/amigo/term/GO:0001974
positive regulation of osteoblast differentiation	Gene Ontology	GO:0045669	7	56	0.162613	0.258151	Bmp6|Clic1|Wnt10b|Cd276|Atraid|Ltf|Ctnnbip1	http://amigo.geneontology.org/amigo/term/GO:0045669
positive regulation of canonical Wnt receptor signaling pathway	Gene Ontology	GO:0090263	7	56	0.162613	0.258151	Wnt2b|Rspo1|Sfrp4|Aspm|Wnt10b|Col1a1|Fgf10	http://amigo.geneontology.org/amigo/term/GO:0090263
response to organic substance	Gene Ontology	GO:0010033	6	46	0.163194	0.258151	Ugt1a1|Gatm|Spp1|P2rx7|Pak1|Btk	http://amigo.geneontology.org/amigo/term/GO:0010033
cell surface receptor signaling pathway	Gene Ontology	GO:0007166	14	130	0.163688	0.258151	Anxa1|Fgfrl1|Tnfrsf1b|Fcgr3|Cd3d|Calcr|Gpr157|Spn|Cd22|Agtr2|Cxcl13|Klrg1|Lck|Fcgr1	http://amigo.geneontology.org/amigo/term/GO:0007166
positive regulation of I-kappaB kinase/NF-kappaB cascade	Gene Ontology	GO:0043123	12	109	0.167876	0.263595	Nek6|Clec4n|Sectm1a|Hmox1|Ubd|Shisa5|Tlr6|Ltf|Rhoc|Lgals1|Tlr9|Adipoq	http://amigo.geneontology.org/amigo/term/GO:0043123
negative regulation of cell proliferation	Gene Ontology	GO:0008285	30	310	0.170745	0.266929	Cdkn2c|Cyp1b1|Fezf2|Wisp2|Hmox1|Igfbp3|Gpc3|Adm|Klf11|Bdkrb2|Sfrp4|Bak1|Fgf10|Fgfrl1|Vdr|Pemt|Sfrp5|Cdkn1a|Lefty1|F2r|Sox9|Cyp27b1|Pttg1|Aldh1a2|Timp2|Rxra|Tlr2|Trp53inp1|Bche|Tes	http://amigo.geneontology.org/amigo/term/GO:0008285
positive regulation of cysteine-type endopeptidase activity involved in apoptotic process	Gene Ontology	GO:0043280	5	37	0.174615	0.270616	F2r|Arl6ip5|Bcl2l11|Ctgf|Acvr1c	http://amigo.geneontology.org/amigo/term/GO:0043280
negative regulation of neuron projection development	Gene Ontology	GO:0010977	5	37	0.174615	0.270616	Lgals1|Lpar1|Stmn2|Dpysl3|Vim	http://amigo.geneontology.org/amigo/term/GO:0010977
cation transport	Gene Ontology	GO:0006812	13	121	0.176861	0.272914	Slc41a3|Sfxn1|Hcn4|Ano10|Atp12a|P2rx6|Atp1a3|Chrna2|Htr3a|Asic2|P2rx4|P2rx7|Slc30a2	http://amigo.geneontology.org/amigo/term/GO:0006812
negative regulation of canonical Wnt receptor signaling pathway	Gene Ontology	GO:0090090	9	79	0.184983	0.284223	Mad2l2|Ankrd6|Grem1|Sfrp4|Sfrp5|Dkk3|Sox9|Gpc3|Draxin	http://amigo.geneontology.org/amigo/term/GO:0090090
transport	Gene Ontology	GO:0006810	149	1725	0.187429	0.285757	Apod|Cygb|Apob|Slc6a19|Apoe|Ttr|Scn3b|Slc19a1|Cpt1a|Unc119|Mpdu1|Steap1|Slc39a1|Snx20|Chmp6|Slc30a2|Abcg2|Snx5|Slc11a1|Slc2a2|Trf|Slc16a10|Kcna7|Gabra4|Gabra3|Slc6a3|Lbp|Snx10|Cpt2|Kcnk13|Apoc4|Gc|Slc15a3|Slc6a8|Necap2|Racgap1|Ykt6|Laptm5|Slc35f5|Atp1a3|Ucp2|Kif20a|Apoc2|Lyve1|Fabp7|Arf2|Gabrp|Cyba|Etfdh|Slc25a16|Slc25a15|Rims3|Slc43a1|Slc25a10|Tap1|Slc40a1|Mb|Slc3a2|Chp1|Scg5|Slc7a10|Kcnab2|Abca…	http://amigo.geneontology.org/amigo/term/GO:0006810
inner ear development	Gene Ontology	GO:0048839	6	48	0.187578	0.285757	H2-K1|H2-DMa|H2-T23|C1qb|Bmper|Mapkapk2	http://amigo.geneontology.org/amigo/term/GO:0048839
negative regulation of BMP signaling pathway	Gene Ontology	GO:0030514	5	39	0.203142	0.308156	Gdf3|Bmper|Grem1|Htra1|Htra3	http://amigo.geneontology.org/amigo/term/GO:0030514
nucleosome assembly	Gene Ontology	GO:0006334	7	60	0.20743	0.313334	Nap1l5|Cenpa|Sox9|Hist1h2af|Hist1h1a|Asf1b|Hist1h2bk	http://amigo.geneontology.org/amigo/term/GO:0006334
epithelial cell differentiation	Gene Ontology	GO:0030855	5	40	0.217954	0.326475	Tagln2|Fgf10|Bdh2|Ces1d|Tagln	http://amigo.geneontology.org/amigo/term/GO:0030855
fat cell differentiation	Gene Ontology	GO:0045444	5	40	0.217954	0.326475	Gpx1|Sox8|Psmb8|Retn|Adig	http://amigo.geneontology.org/amigo/term/GO:0045444
negative regulation of neuron apoptotic process	Gene Ontology	GO:0043524	14	138	0.22265	0.33212	Erbb3|Ngf|Apoe|Lgmn|Crlf1|Birc5|Hmox1|Gdf5|F2r|Adam8|Lrp1|Axl|Agtr2|Draxin	http://amigo.geneontology.org/amigo/term/GO:0043524
erythrocyte differentiation	Gene Ontology	GO:0030218	5	41	0.233087	0.346245	Hcls1|Rps19|Rps14|Fech|Sfxn1	http://amigo.geneontology.org/amigo/term/GO:0030218
negative regulation of apoptotic process	Gene Ontology	GO:0043066	36	393	0.234091	0.3463	Stil|Socs3|Psen2|Angptl4|Clu|Ucp2|Asic2|Cd74|Fn1|Nme2|Tsc22d1|Card14|Gpx1|Spp1|Aurka|Plac8|Dpep1|Ffar4|Il2rb|Slc40a1|Plk1|Cdkn1a|Insl6|Muc4|Rps6|Sox8|Sox9|Axl|Clec5a|Timp1|Cd44|Birc5|Alb|Cdk1|Ywhah|Fabp1	http://amigo.geneontology.org/amigo/term/GO:0043066
negative regulation of protein phosphorylation	Gene Ontology	GO:0001933	6	52	0.240079	0.353001	Ccnb1|Psen2|Chp1|Xdh|Igfbp3|Pbk	http://amigo.geneontology.org/amigo/term/GO:0001933
transmembrane transport	Gene Ontology	GO:0055085	34	371	0.240929	0.353001	Cacna1h|Slc16a1|Slc30a2|Slc16a2|Slc5a12|Kcna7|Abcd3|Abcd2|Slc17a5|Slc19a1|Mfsd1|Hcn4|Slc25a30|Sfxn1|Slc39a1|Slc43a1|Slc25a10|Tap1|Hvcn1|Slc2a2|Aqp8|Slc16a10|Slc25a16|Trpv5|Cftr|Abcc2|Slc7a8|Nalcn|Gjb1|Slc13a1|Slc5a2|Abca8b|Slc25a24|Slc39a7	http://amigo.geneontology.org/amigo/term/GO:0055085
regulation of ion transmembrane transport	Gene Ontology	GO:0034765	16	163	0.241579	0.353001	Cacna1h|Clic6|Kcnj15|Clic1|Nalcn|Hcn4|Hvcn1|Kcnk13|Asic2|Cybb|Stom|Htr3a|Kcna7|Kcnab2|Kcnip2|Scn3b	http://amigo.geneontology.org/amigo/term/GO:0034765
cell-cell signaling	Gene Ontology	GO:0007267	7	63	0.243737	0.354707	Wnt2b|Grem1|Ccl5|Wnt10b|Sh2d1a|Cxcl13|Fgf10	http://amigo.geneontology.org/amigo/term/GO:0007267
glucose homeostasis	Gene Ontology	GO:0042593	10	96	0.245226	0.355428	Cnr1|Pck1|Slc16a1|G6pc|Rps6|Adra1b|Nmb|Pdk4|Rbp4|Adipoq	http://amigo.geneontology.org/amigo/term/GO:0042593
cytokinesis	Gene Ontology	GO:0000910	5	42	0.248505	0.358729	Rhoc|Plk1|Prc1|Birc5|Kif20a	http://amigo.geneontology.org/amigo/term/GO:0000910
cytoskeleton organization	Gene Ontology	GO:0007010	9	86	0.256481	0.367921	Ccl2|Ccl11|Sirpa|Rhou|Ywhah|Sox9|Ablim3|Ccl24|Tagln	http://amigo.geneontology.org/amigo/term/GO:0007010
protein stabilization	Gene Ontology	GO:0050821	8	75	0.256928	0.367921	Gpihbp1|Chp1|Apoa1|Zswim7|Lamp2|Lamp1|Clu|Wnt10b	http://amigo.geneontology.org/amigo/term/GO:0050821
calcium ion transport	Gene Ontology	GO:0006816	13	131	0.257956	0.367921	Cacna1h|Vdr|Ccdc109b|Psen2|Ccl5|Ramp1|Ramp3|Kcnn4|Coro1a|Cyp27b1|Trpv5|P2rx4|P2rx7	http://amigo.geneontology.org/amigo/term/GO:0006816
regulation of cell proliferation	Gene Ontology	GO:0042127	14	144	0.27195	0.386341	Anxa1|Erbb3|Nos2|Hhex|Arx|Mzb1|Ptger2|Sparc|Sox9|Tnfrsf9|Mmp7|Dusp22|Tes|Cela1	http://amigo.geneontology.org/amigo/term/GO:0042127
cytokine-mediated signaling pathway	Gene Ontology	GO:0019221	9	88	0.278399	0.39394	Cd74|Ccl2|Il2rb|Il6ra|Cx3cr1|Klf6|Ccr2|Ptprn|Iigp1	http://amigo.geneontology.org/amigo/term/GO:0019221
positive regulation of cAMP biosynthetic process	Gene Ontology	GO:0030819	5	44	0.280056	0.394725	Calcr|Adm|Ramp1|Nme2|Mrap	http://amigo.geneontology.org/amigo/term/GO:0030819
autophagy	Gene Ontology	GO:0006914	9	89	0.289552	0.406508	Srpx|Ei24|Npc1|Trp53inp1|S100a9|S100a8|Dap|5330417C22Rik|Irgm1	http://amigo.geneontology.org/amigo/term/GO:0006914
positive regulation of peptidyl-tyrosine phosphorylation	Gene Ontology	GO:0050731	8	78	0.292483	0.40902	Cd74|Il6ra|Cd44|Thbs4|Icam1|Hcls1|Fgf10|Adipoq	http://amigo.geneontology.org/amigo/term/GO:0050731
response to glucose stimulus	Gene Ontology	GO:0009749	5	45	0.29612	0.409579	Acvr1c|Fkbp1b|Adipoq|Apoa2|Nnat	http://amigo.geneontology.org/amigo/term/GO:0009749
regulation of inflammatory response	Gene Ontology	GO:0050727	5	45	0.29612	0.409579	Tlr9|Slc7a2|Gpx4|S100a8|Ahsg	http://amigo.geneontology.org/amigo/term/GO:0050727
negative regulation of catalytic activity	Gene Ontology	GO:0043086	6	56	0.296315	0.409579	Anxa1|Anxa3|Scg5|Nqo1|Apoc2|Ugt1a1	http://amigo.geneontology.org/amigo/term/GO:0043086
locomotory behavior	Gene Ontology	GO:0007626	9	90	0.30082	0.414206	Slc6a3|Sepp1|Adra1b|Etv5|Fezf2|Hexa|Hexb|Gpr88|Asl	http://amigo.geneontology.org/amigo/term/GO:0007626
response to stress	Gene Ontology	GO:0006950	11	113	0.302836	0.415384	Ang|Rbm3|Hspb1|Rcan1|Cirbp|Hilpda|Pak1|Bdkrb2|Hspb8|Sbk2|Mapkapk2	http://amigo.geneontology.org/amigo/term/GO:0006950
hemopoietic progenitor cell differentiation	Gene Ontology	GO:0002244	8	79	0.304596	0.416204	Pld4|Sirpa|Psen2|Anln|Kcnab2|Arl11|Muc4|Tnfrsf13b	http://amigo.geneontology.org/amigo/term/GO:0002244
response to endoplasmic reticulum stress	Gene Ontology	GO:0034976	5	46	0.312331	0.42515	Thbs4|Ufc1|Bcl2l11|Alox15|Srpx	http://amigo.geneontology.org/amigo/term/GO:0034976
negative regulation of sequence-specific DNA binding transcription factor activity	Gene Ontology	GO:0043433	6	58	0.325353	0.441199	Mad2l2|Sfrp4|Sfrp5|Hmox1|Id2|Ctnnbip1	http://amigo.geneontology.org/amigo/term/GO:0043433
positive regulation of neuron differentiation	Gene Ontology	GO:0045666	8	82	0.34152	0.461374	Bmp6|Ngf|Etv5|Timp2|Fezf2|Ccl5|Fez1|Gdf5	http://amigo.geneontology.org/amigo/term/GO:0045666
negative regulation of NF-kappaB transcription factor activity	Gene Ontology	GO:0032088	6	60	0.354751	0.477447	Cyp1b1|Chp1|Rps3|Dap|Tlr9|Cmklr1	http://amigo.geneontology.org/amigo/term/GO:0032088
negative regulation of Wnt receptor signaling pathway	Gene Ontology	GO:0030178	5	49	0.361512	0.482946	Lrp1|Tsku|Dkk3|Ctnnbip1|Sfrp5	http://amigo.geneontology.org/amigo/term/GO:0030178
forebrain development	Gene Ontology	GO:0030900	7	72	0.361535	0.482946	Stil|Hhex|Fezf2|Arx|Psen2|Draxin|Aldh1a2	http://amigo.geneontology.org/amigo/term/GO:0030900
regulation of cell cycle	Gene Ontology	GO:0051726	9	96	0.370194	0.492674	Ccnb2|Ccnb1|Ccna2|Cdkn1a|Tacc3|Mastl|Bak1|Gnb2l1|Cops5	http://amigo.geneontology.org/amigo/term/GO:0051726
cellular calcium ion homeostasis	Gene Ontology	GO:0006874	7	73	0.37506	0.497301	Ccl2|Vdr|Ccl5|Hexb|Apoe|Trpv5|Rgn	http://amigo.geneontology.org/amigo/term/GO:0006874
neuron projection morphogenesis	Gene Ontology	GO:0048812	5	50	0.377983	0.499329	Clu|Thbs4|Pak1|Ngf|Epb4.1l3	http://amigo.geneontology.org/amigo/term/GO:0048812
positive regulation of protein phosphorylation	Gene Ontology	GO:0001934	12	133	0.386956	0.509302	Rspo1|Ctgf|Card14|Gnb2l1|Cd6|Sox9|Adipoq|Spn|C3|Pak1|P2rx7|Cdc42	http://amigo.geneontology.org/amigo/term/GO:0001934
response to hypoxia	Gene Ontology	GO:0001666	9	98	0.39372	0.516306	Il18|Nos2|Ang|Mb|Mmp2|Tacc3|Ppara|Acot2|Pak1	http://amigo.geneontology.org/amigo/term/GO:0001666
G1/S transition of mitotic cell cycle	Gene Ontology	GO:0000082	5	52	0.410866	0.536825	Cdkn2c|Rps6|Cdkn1a|Rhou|Cdca5	http://amigo.geneontology.org/amigo/term/GO:0000082
negative regulation of cell migration	Gene Ontology	GO:0030336	7	76	0.41571	0.541178	Cyp1b1|Dpysl3|Cx3cr1|Sulf1|Trp53inp1|Dpep1|Adipoq	http://amigo.geneontology.org/amigo/term/GO:0030336
endocytosis	Gene Ontology	GO:0006897	13	149	0.426513	0.55215	Mrc1|Rab34|Nme1|Snx5|Necap2|Asgr1|Npc1|Lrp1|Ly75|Cd209b|Cd209a|Siglec1|Cd209d	http://amigo.geneontology.org/amigo/term/GO:0006897
positive regulation of neuron apoptotic process	Gene Ontology	GO:0043525	5	53	0.427222	0.55215	Il18|Bcl2l11|Nqo1|Pmaip1|Cdc42	http://amigo.geneontology.org/amigo/term/GO:0043525
cell migration	Gene Ontology	GO:0016477	12	138	0.437401	0.563272	Mmp14|Ang|Sirpa|Jam3|Cd44|Gab2|Ctgf|Coro1a|Trem1|Cxcr4|Gfra1|Mmp2	http://amigo.geneontology.org/amigo/term/GO:0016477
chloride transport	Gene Ontology	GO:0006821	7	78	0.442714	0.56807	Clic6|Clic1|Gabrp|Ano10|Gabra4|Cftr|Gabra3	http://amigo.geneontology.org/amigo/term/GO:0006821
dephosphorylation	Gene Ontology	GO:0016311	14	164	0.453576	0.579929	Ptpn22|Acp5|Ephx2|Mtmr11|Cdkn3|G6pc|Nt5c1a|Ptprn|Dusp4|Dusp22|Ptpn7|Lck|Sgpp1|Alpl	http://amigo.geneontology.org/amigo/term/GO:0016311
regulation of cell migration	Gene Ontology	GO:0030334	5	55	0.459637	0.583511	Mmp10|Ccr2|Enpp2|Mmp3|Cxcr4	http://amigo.geneontology.org/amigo/term/GO:0030334
steroid hormone mediated signaling pathway	Gene Ontology	GO:0043401	5	55	0.459637	0.583511	Vdr|Rxrg|Rxra|Paqr7|Ppara	http://amigo.geneontology.org/amigo/term/GO:0043401
signal transduction	Gene Ontology	GO:0007165	92	1126	0.465037	0.588281	Adora3|Anxa1|Plcxd3|Unc5cl|Rhoc|Gnai2|Oprl1|Ffar4|Wnt2b|Cx3cr1|Gpr18|F2r|Sox8|Sox9|Cxcr6|Olfr56|Cxcr4|Gabra3|Cnr1|Erbb3|Cnr2|Gpr141|C3ar1|Unc5a|Trem2|Cd300a|Socs3|Racgap1|Cd160|Tlr13|Lgals1|Adra1a|Mrc1|Adra1b|Gpr157|Lyve1|Gabrp|Fgg|Cysltr2|Fgb|Cd74|Hhex|Calcr|Gpr88|Tlr6|Arhgap11a|Tlr8|Tlr9|Pdpn|Ptafr|Ptger2|Arhgap36|Lpar3|Lpar1|P2rx4|Lpar5|Nek6|Bdkrb2|Gdf3|Ltb4r1|Traip|Sfrp4|Ccr2|Grem1|Chrna2|Agt…	http://amigo.geneontology.org/amigo/term/GO:0007165
positive regulation of cell growth	Gene Ontology	GO:0030307	6	68	0.472431	0.595529	Mmp14|Ngf|Dnph1|Acsl4|Cyba|Cxcl16	http://amigo.geneontology.org/amigo/term/GO:0030307
cell proliferation	Gene Ontology	GO:0008283	15	180	0.487439	0.612292	Lipa|Cd74|Lrp1|Tnfrsf1b|Uchl1|Tacc3|Cfb|Pdpn|Bak1|Gpx1|Melk|Hhex|Prdx1|Gnai2|Txnrd1	http://amigo.geneontology.org/amigo/term/GO:0008283
positive regulation of peptidyl-serine phosphorylation	Gene Ontology	GO:0033138	5	57	0.491502	0.613093	Mad2l2|Cd44|Pak1|Hcls1|Cdc42	http://amigo.geneontology.org/amigo/term/GO:0033138
protein homotetramerization	Gene Ontology	GO:0051289	5	57	0.491502	0.613093	Decr1|Dcxr|Gpx3|Mat1a|Aldh1a1	http://amigo.geneontology.org/amigo/term/GO:0051289
apoptotic process	Gene Ontology	GO:0006915	43	531	0.513881	0.638783	Acvr1c|Ckap2|Hmox1|Melk|Rnf144b|Bcl2l11|Lgals1|Card14|Tnfrsf12a|Nek6|Gpx1|Klf11|Cdk1|Bak1|Ei24|Shisa5|Dnase1|Dap|Srgn|Bub1b|Tm2d1|Pmaip1|Gzma|Lcn2|Krt20|Tpx2|Sulf1|Gnb2l1|S100a9|S100a8|G0s2|Pdcd6|Cidec|Pdcd1|Epb4.1l3|Birc5|Unc5a|Pak1|Hcar2|Trp53inp1|Gas2|Hint1|Btk	http://amigo.geneontology.org/amigo/term/GO:0006915
negative regulation of cell growth	Gene Ontology	GO:0030308	9	110	0.533185	0.660485	Cdkn2c|Gdf9|Grem1|Cdkn1a|Gnb2l1|Ahsg|Ei24|Hrg|Cyp27b1	http://amigo.geneontology.org/amigo/term/GO:0030308
blood vessel development	Gene Ontology	GO:0001568	5	60	0.537917	0.66405	Col3a1|Lox|Col1a2|Aldh1a2|Col1a1	http://amigo.geneontology.org/amigo/term/GO:0001568
organ morphogenesis	Gene Ontology	GO:0009887	8	99	0.551649	0.678661	Wnt2b|Vdr|Grem1|Hhex|Wnt10b|Gpc3|Cxcr4|Fgf10	http://amigo.geneontology.org/amigo/term/GO:0009887
potassium ion transmembrane transport	Gene Ontology	GO:0071805	9	112	0.555462	0.681011	Kcnj15|Hcn4|P2ry12|Kcnk13|Kcnn4|Atp1a3|Htr3a|Kcna7|Kcnip2	http://amigo.geneontology.org/amigo/term/GO:0071805
translation	Gene Ontology	GO:0006412	19	240	0.56959	0.69595	Rbm3|Mrpl23|Rpl8|Rps14|Rpl18a|Rps19|Rpl9|Rpl32|Eif3e|Eif6|Rps7|Rps6|Rps5|Rps3|Rps28|Rps4x|Mrpl14|Eef1a2|Rps16	http://amigo.geneontology.org/amigo/term/GO:0006412
protein homooligomerization	Gene Ontology	GO:0051260	13	165	0.57765	0.703398	Cpt1a|Scube1|Dpysl3|Thbs4|C1qtnf1|Hmox1|Mat1a|Stom|Angptl4|Kcna7|P2rx4|Adipoq|P2rx6	http://amigo.geneontology.org/amigo/term/GO:0051260
memory	Gene Ontology	GO:0007613	5	63	0.58228	0.705454	Cnr1|Psen2|Ngf|Atp1a3|Fen1	http://amigo.geneontology.org/amigo/term/GO:0007613
DNA recombination	Gene Ontology	GO:0006310	6	76	0.583281	0.705454	Rpa2|Apex1|Pif1|Zswim7|Nsmce1|Rpain	http://amigo.geneontology.org/amigo/term/GO:0006310
intracellular signal transduction	Gene Ontology	GO:0035556	28	356	0.585684	0.705738	Asb10|Ngf|Socs3|Racgap1|Psen2|Gab2|Nfam1|Sbk2|Asb4|Asb9|Traip|Gucy1a3|Nsmce1|Spsb1|Gnai2|Net1|Lat2|Hmox1|Gnb2l1|Agtr2|Stac2|Hspb1|Ctgf|Neurl2|Dok1|Depdc7|Pak1|Btk	http://amigo.geneontology.org/amigo/term/GO:0035556
small GTPase mediated signal transduction	Gene Ontology	GO:0007264	17	217	0.587458	0.705738	Rab37|Rab34|Rab32|Rab31|Rab30|Arf2|Hmox1|Rnd2|Rhou|Arl11|Rab44|Rab3d|Rab3b|Rhoc|Rab12|Arl4c|Cdc42	http://amigo.geneontology.org/amigo/term/GO:0007264
activation of MAPK activity	Gene Ontology	GO:0000187	5	64	0.59655	0.712082	Lpar1|Lpar3|Fgf10|P2rx7|Cd74	http://amigo.geneontology.org/amigo/term/GO:0000187
post-embryonic development	Gene Ontology	GO:0009791	7	90	0.596716	0.712082	Sepp1|Bcl2l11|Serpina7|Etnk2|Apob|Asl|Cela1	http://amigo.geneontology.org/amigo/term/GO:0009791
cell cycle arrest	Gene Ontology	GO:0007050	6	78	0.609098	0.724442	Cdkn2c|Cdkn3|Cdkn1a|Trp53inp1|Gas2|Wnt10b	http://amigo.geneontology.org/amigo/term/GO:0007050
transmembrane receptor protein tyrosine kinase signaling pathway	Gene Ontology	GO:0007169	5	67	0.637662	0.753315	Gfra1|Dok1|Gab2|Angptl1|Erbb3	http://amigo.geneontology.org/amigo/term/GO:0007169
negative regulation of cysteine-type endopeptidase activity involved in apoptotic process	Gene Ontology	GO:0043154	5	67	0.637662	0.753315	Gpx1|Cd44|Birc5|Dpep1|Fabp1	http://amigo.geneontology.org/amigo/term/GO:0043154
potassium ion transport	Gene Ontology	GO:0006813	9	120	0.639687	0.753315	Kcnj15|Hcn4|Kcnk13|Kcnab2|Kcnn4|Atp1a3|Kcna7|Atp12a|Kcnip2	http://amigo.geneontology.org/amigo/term/GO:0006813
canonical Wnt receptor signaling pathway	Gene Ontology	GO:0060070	6	81	0.646106	0.754596	Wnt2b|Rspo1|Sfrp5|Sdc1|Wnt10b|Cdc42	http://amigo.geneontology.org/amigo/term/GO:0060070
multicellular organism growth	Gene Ontology	GO:0035264	6	81	0.646106	0.754596	Stil|Hhex|G6pc|Etnk2|Cdc42|Cela1	http://amigo.geneontology.org/amigo/term/GO:0035264
regulation of gene expression	Gene Ontology	GO:0010468	12	160	0.647097	0.754596	Rspo1|Apoe|G6pc|Fgf10|Lmx1a|Atraid|Tsku|Ppara|Nov|Trim63|Hrg|Fech	http://amigo.geneontology.org/amigo/term/GO:0010468
cartilage development	Gene Ontology	GO:0051216	5	68	0.650776	0.756421	Mgp|Bmp6|Sox9|Gdf5|Sulf1	http://amigo.geneontology.org/amigo/term/GO:0051216
Wnt receptor signaling pathway	Gene Ontology	GO:0016055	14	187	0.654906	0.758758	Wnt2b|Rspo1|Hhex|Sfrp4|Sfrp5|Cd44|Wnt10b|Dkk3|Cpz|Ctnnbip1|Wdr61|Csnk2b|Draxin|Cela1	http://amigo.geneontology.org/amigo/term/GO:0016055
G-protein coupled receptor signaling pathway	Gene Ontology	GO:0007186	46	606	0.692906	0.798124	Apoe|Entpd1|Adora3|Ackr1|Ptafr|Ptger2|Lpar3|Lpar1|Vmn2r1|Lpar5|Adra1a|Bdkrb2|Gpr157|P2ry6|Ltb4r1|P2ry12|Gnai2|Oprl1|Ffar4|Tm2d1|Cysltr2|Cx3cr1|Gpr18|F2r|Ccr2|Adrb3|Adra1b|Olfr56|Cxcr4|Agtr2|Gpr35|Gpr34|Cnr1|Cnr2|Gpr141|C3ar1|Calcr|Ramp1|Ramp3|Gpr88|Hcar2|Ccr3|S1pr2|Cmklr1|Apoa1|Cxcr6	http://amigo.geneontology.org/amigo/term/GO:0007186
ion transmembrane transport	Gene Ontology	GO:0034220	10	139	0.693343	0.798124	Slc6a3|Chrna2|Slc17a5|Hvcn1|Hcn4|Asic2|Slc25a24|P2rx4|P2rx7|P2rx6	http://amigo.geneontology.org/amigo/term/GO:0034220
hemopoiesis	Gene Ontology	GO:0030097	5	73	0.711696	0.816625	Klf11|Tacc3|Hhex|Rtkn2|Ccr2	http://amigo.geneontology.org/amigo/term/GO:0030097
sensory perception of sound	Gene Ontology	GO:0007605	8	115	0.719347	0.821619	Hexa|Gjb3|Hexb|Asic2|Gpx1|Crym|Icam1|Col1a1	http://amigo.geneontology.org/amigo/term/GO:0007605
positive regulation of cell proliferation	Gene Ontology	GO:0008284	29	393	0.721564	0.821619	Ngf|Il6ra|Plac8|Wnt10b|Gab2|Ctgf|Hcls1|Clu|Adm|Gdf9|Tsc22d1|Hilpda|Nmb|Fgf10|Gnai2|Klb|Id2|Rtkn2|Chp2|F2r|Sox9|Agtr2|Aldh1a2|Grem1|Timp1|Crlf1|Mzb1|Cdc20|Cst3	http://amigo.geneontology.org/amigo/term/GO:0008284
peptidyl-serine phosphorylation	Gene Ontology	GO:0018105	5	74	0.722933	0.821619	Nek6|Cdk1|Plk1|Mapkapk2|Pbk	http://amigo.geneontology.org/amigo/term/GO:0018105
regulation of apoptotic process	Gene Ontology	GO:0042981	8	116	0.728288	0.825086	Pmaip1|Acvr1c|Bak1|Rps3|Bcl2l11|Agtr2|Card14|Cidec	http://amigo.geneontology.org/amigo/term/GO:0042981
GTP catabolic process	Gene Ontology	GO:0006184	11	158	0.738092	0.833555	Rab37|Rab34|Tuba1c|Gbp2|Tubb5|Rhou|Gnai2|Tubb4b|Tubb2a|Iigp1|Cdc42	http://amigo.geneontology.org/amigo/term/GO:0006184
intracellular protein transport	Gene Ontology	GO:0006886	13	188	0.758637	0.854063	Cd74|Snx5|Snx10|Gpihbp1|Ramp1|Ramp3|Stx11|Unc93b1|Ywhah|Tomm20|Pdcd6|Syndig1|Scg5	http://amigo.geneontology.org/amigo/term/GO:0006886
in utero embryonic development	Gene Ontology	GO:0001701	17	245	0.776692	0.871648	Ccnb2|Ly6e|Hhex|Apob|Ccnb1|Acvr1c|Gdf3|Rxra|Dnmt3l|Hcn4|Sox8|Slc34a2|Etnk2|Bcl2l11|Hc|Stil|Maff	http://amigo.geneontology.org/amigo/term/GO:0001701
defense response	Gene Ontology	GO:0006952	6	94	0.780139	0.87278	Cd74|Tap1|Tapbp|Defb36|Cst3|Irgm1	http://amigo.geneontology.org/amigo/term/GO:0006952
neuron differentiation	Gene Ontology	GO:0030182	6	100	0.82739	0.922759	Wnt2b|Wnt10b|Lmx1a|Acsl4|Gfra1|Aldh1a2	http://amigo.geneontology.org/amigo/term/GO:0030182
exocytosis	Gene Ontology	GO:0006887	5	86	0.833683	0.926889	Rims3|Rab3d|Pak1|Ykt6|Ccl5	http://amigo.geneontology.org/amigo/term/GO:0006887
brain development	Gene Ontology	GO:0007420	7	117	0.842776	0.934099	Sepp1|Sfrp4|Sfrp5|Aspm|Cxcr4|Lmx1a|Nnat	http://amigo.geneontology.org/amigo/term/GO:0007420
positive regulation of sequence-specific DNA binding transcription factor activity	Gene Ontology	GO:0051091	5	88	0.848081	0.937077	Nfam1|Wnt10b|Anxa3|Ngf|Trim31	http://amigo.geneontology.org/amigo/term/GO:0051091
rRNA processing	Gene Ontology	GO:0006364	6	104	0.85413	0.938752	Rps16|Rps19|Rbfa|Rps28|Rps7|Rps6	http://amigo.geneontology.org/amigo/term/GO:0006364
axon guidance	Gene Ontology	GO:0007411	7	119	0.854841	0.938752	Etv1|Fezf2|Arx|Unc5a|Lmx1a|Sema4f|Draxin	http://amigo.geneontology.org/amigo/term/GO:0007411
spermatogenesis	Gene Ontology	GO:0007283	19	292	0.866003	0.948101	Sox9|Acox1|Bcl2l11|Dzip1|Racgap1|Aspm|Insl6|Adamts2|Mtl5|Hist1h1a|Jam3|Sox8|Prdx4|Rbp4|Gpx4|Lamp1|Apob|Txnrd3|Axl	http://amigo.geneontology.org/amigo/term/GO:0007283
heart development	Gene Ontology	GO:0007507	10	167	0.875386	0.955451	Mb|Id2|Rxra|Fbn1|Sox9|Rbp4|Vcam1|Col3a1|Adm|Aldh1a2	http://amigo.geneontology.org/amigo/term/GO:0007507
kidney development	Gene Ontology	GO:0001822	5	93	0.879602	0.956548	Bmp6|Gpc3|Bcl2l11|Sulf1|Fbn1	http://amigo.geneontology.org/amigo/term/GO:0001822
DNA replication	Gene Ontology	GO:0006260	7	124	0.881734	0.956548	Gins2|Gins1|Rfc5|Rpa2|Ctgf|Fen1|Chaf1b	http://amigo.geneontology.org/amigo/term/GO:0006260
defense response to virus	Gene Ontology	GO:0051607	6	112	0.897429	0.97063	Oasl1|Tlr7|Unc93b1|Tlr8|Tlr9|Cd86	http://amigo.geneontology.org/amigo/term/GO:0051607
actin cytoskeleton organization	Gene Ontology	GO:0030036	7	128	0.900137	0.97063	Pdlim4|Rhou|Itpka|Coro1c|Coro1a|Fam101b|Pak1	http://amigo.geneontology.org/amigo/term/GO:0030036
peptidyl-tyrosine phosphorylation	Gene Ontology	GO:0018108	5	98	0.905369	0.973339	Twf1|Melk|Fgfrl1|Lck|Btk	http://amigo.geneontology.org/amigo/term/GO:0018108
embryo development	Gene Ontology	GO:0009790	5	101	0.918403	0.984396	Racgap1|Psen2|Birc5|Rbp4|Sfrp4	http://amigo.geneontology.org/amigo/term/GO:0009790
protein ubiquitination	Gene Ontology	GO:0016567	10	180	0.923386	0.986782	Fbxo40|Plk1|Asb9|Traip|Ubd|Ccnf|Neurl3|Trim59|Nsmce1|Trim63	http://amigo.geneontology.org/amigo/term/GO:0016567
protein dephosphorylation	Gene Ontology	GO:0006470	6	122	0.935675	0.996939	Ptpn22|Cdc25c|Ptprn|Dusp4|Dusp22|Ptpn7	http://amigo.geneontology.org/amigo/term/GO:0006470
protein folding	Gene Ontology	GO:0006457	5	112	0.953626	1	Fkbp5|Qsox1|Fkbp1b|Fkbp10|Apoa2	http://amigo.geneontology.org/amigo/term/GO:0006457
cell projection organization	Gene Ontology	GO:0030030	5	120	0.969839	1	Dnaic2|Snx10|Aurka|Ttc30b|P2ry12	http://amigo.geneontology.org/amigo/term/GO:0030030
protein autophosphorylation	Gene Ontology	GO:0046777	7	159	0.976506	1	Nek6|Nek2|Nme2|Lck|Melk|Pak1|Btk	http://amigo.geneontology.org/amigo/term/GO:0046777
ubiquitin-dependent protein catabolic process	Gene Ontology	GO:0006511	5	131	0.983686	1	Ubd|Psma6|Uchl1|Usp22|Psma2	http://amigo.geneontology.org/amigo/term/GO:0006511
phosphorylation	Gene Ontology	GO:0016310	40	665	0.983766	1	Pck1|Acvr1c|Tyrobp|Cmpk2|Adck3|Pkib|Nek6|Melk|Etnk2|Sbk2|Matk|Nme4|Nek2|Nme1|Nme2|Bub1b|Mastl|Mapkapk2|Plk1|Aurka|Aurkb|Cdkl4|Camk2n2|Lck|Pklr|Camk1g|Prps1|Camk1|Sephs2|Cdkn1a|Mapk4|Pbk|Erbb3|Axl|Csnk2b|Itpka|Cdk1|Pdk4|Pak1|Btk	http://amigo.geneontology.org/amigo/term/GO:0016310
DNA repair	Gene Ontology	GO:0006281	14	290	0.989111	1	Mpg|Mgmt|Rps3|Rpa2|Apex1|Pif1|Zswim7|Fen1|Kif22|Chaf1b|Pttg1|Rpain|Fanci|Nsmce1	http://amigo.geneontology.org/amigo/term/GO:0006281
nervous system development	Gene Ontology	GO:0007399	16	325	0.990513	1	Apob|Dpysl3|Fezf2|Prps1|Camk1|Thbs4|Cxcr4|Cdc20|Arx|Gfra1|Lhx6|Bex1|Cdc42|Islr2|Sema4f|Nme1	http://amigo.geneontology.org/amigo/term/GO:0007399
ATP catabolic process	Gene Ontology	GO:0006200	7	179	0.99169	1	Tap1|Anxa1|Entpd1|Pif1|Atp1a3|Abca8b|Abcd3	http://amigo.geneontology.org/amigo/term/GO:0006200
protein transport	Gene Ontology	GO:0015031	31	557	0.991799	1	Necap2|Psen2|Ykt6|Kif20a|Unc119|Rab44|Rab3d|Rab3b|Snx20|Chmp6|Tap1|Snx5|H2-DMa|Chp1|Chp2|Chmp2b|Col1a1|Rab37|Rab34|Rab32|Rab31|Snx10|Calcr|Rab30|Ramp1|Ramp3|Stx11|Tomm20|Arf2|Slc15a3|Rab12	http://amigo.geneontology.org/amigo/term/GO:0015031
protein phosphorylation	Gene Ontology	GO:0006468	32	584	0.994524	1	Ccnb1|Acvr1c|Melk|Sbk2|Matk|P2rx7|Nek6|Nek2|Bub1b|Mastl|Mapkapk2|Camk1|Aurka|Aurkb|Lck|Camk1g|Ccl5|Plk1|Cdkl4|Cdkn1a|Sox9|Mapk4|Axl|Erbb3|Igfbp3|Birc5|Itpka|Cdk1|Pdk4|Pbk|Pak1|Btk	http://amigo.geneontology.org/amigo/term/GO:0006468
methylation	Gene Ontology	GO:0032259	5	161	0.997267	1	Mgmt|Nnmt|Pemt|Dnmt3l|Comt	http://amigo.geneontology.org/amigo/term/GO:0032259
positive regulation of transcription, DNA-dependent	Gene Ontology	GO:0045893	26	518	0.997779	1	Irf7|Fezf2|Ppara|Id2|Agtr2|Usp22|Etv1|Psmd9|Irf4|Irf8|Fgf10|Mad2l2|Ccna2|Trf|F2r|Sox8|Sox9|Ebf2|Col1a1|Etv5|Myrf|Grem1|Rxra|Ywhah|Trp53inp1|Lbh	http://amigo.geneontology.org/amigo/term/GO:0045893
cell differentiation	Gene Ontology	GO:0030154	36	671	0.997831	1	Acvr1c|Dzip1|Racgap1|Mtl5|Ctgf|Psmb8|Lgals3|Tnfrsf12a|Etv5|Nme1|Lhx6|Atraid|Tmem119|Rbm11|Mgp|Sema4f|Sfrp4|Sfrp5|Camk1|Bex1|Mmp19|Rps7|Sox9|Myrf|Axl|Bmp6|Ang|Hhex|Arx|Paqr7|Cdc20|Fezf2|Tcf23|Txnrd3|Cxcl17|Cdc42	http://amigo.geneontology.org/amigo/term/GO:0030154
response to DNA damage stimulus	Gene Ontology	GO:0006974	15	369	0.999375	1	Mad2l2|Mpg|Pmaip1|Cdkn1a|Mgmt|Rpa2|Apex1|Pif1|Zswim7|Fen1|Nsmce1|Chaf1b|Pttg1|Mapkapk2|Fanci	http://amigo.geneontology.org/amigo/term/GO:0006974
regulation of transcription from RNA polymerase II promoter	Gene Ontology	GO:0006357	12	317	0.999383	1	Etv1|Sfrp5|Vdr|Irf7|Sfrp4|Etv5|Wnt10b|Rxrg|Rxra|Sox9|Hhex|Bnc1	http://amigo.geneontology.org/amigo/term/GO:0006357
negative regulation of transcription, DNA-dependent	Gene Ontology	GO:0045892	14	408	0.999967	1	Klf11|Grem1|Hhex|Birc5|Id2|Dkk3|Dnmt3l|Sox8|Sox9|Dap|Ramp3|Vdr|Mxd3|Adipoq	http://amigo.geneontology.org/amigo/term/GO:0045892
negative regulation of transcription from RNA polymerase II promoter	Gene Ontology	GO:0000122	21	556	0.99999	1	Mad2l2|Bhlhe41|Klf11|Hhex|Fezf2|Rps14|Plk1|Psen2|Wnt10b|Ppara|Id2|Rxra|Lefty1|Crym|Zbtb42|Vdr|Aurkb|Ctnnbip1|Hcls1|Dusp22|Cela1	http://amigo.geneontology.org/amigo/term/GO:0000122
positive regulation of transcription from RNA polymerase II promoter	Gene Ontology	GO:0045944	32	758	0.999995	1	Wdr61|Plac8|Wnt10b|Hexb|Ppara|Hcls1|Lum|2700060E02Rik|Irf7|Nme2|Irf4|Klf6|Fgf10|Cela1|Vdr|Slc11a1|Chp2|Sox8|Sox9|Ebf2|Ablim3|Ckap2|Psmd9|Bmp6|Grem1|Hhex|Rxrg|Rxra|Cops5|Tlr2|Il33|Tlr9	http://amigo.geneontology.org/amigo/term/GO:0045944
transcription from RNA polymerase II promoter	Gene Ontology	GO:0006366	11	398	0.999998	1	Etv1|Klf11|Vdr|Irf7|Bhlhe41|Rxrg|Rxra|Sox8|Sox9|Ppara|Etv5	http://amigo.geneontology.org/amigo/term/GO:0006366
multicellular organismal development	Gene Ontology	GO:0007275	44	987	0.999999	1	Stil|Fezf2|Dzip1|Racgap1|Wnt10b|Olfml3|Id2|Pdpn|Tnfrsf12a|Islr2|Draxin|Mtl5|Itgb2|Bex1|Itgb7|Lmx1a|Dkk3|Rbm11|Mgp|Gpx4|Rps4x|Lrp1|Vdr|Sfrp4|Sfrp5|Camk1|Mmp19|Lefty1|Gnb2l1|Ang|Ebf2|Sema4f|Wnt2b|Bmp6|Hhex|Lhx6|Arx|Unc5a|Paqr7|Nnat|Lbh|Txnrd3|Cxcl17|Tcf23	http://amigo.geneontology.org/amigo/term/GO:0007275
regulation of transcription, DNA-dependent	Gene Ontology	GO:0006355	50	1845	1	1	Fezf2|Etv5|Ppara|Apex1|Zbtb42|Chaf1b|Vgll3|Usp22|Asf1b|Etv1|Klf11|2700060E02Rik|Bnc1|Creg1|Lhx6|Irf4|Tsc22d1|Irf8|Lmx1a|Maff|Klf6|Carhsp1|Mmp14|Mad2l2|Vdr|Sox8|Sfmbt2|Klf10|Ebf2|Irf7|Myrf|Tceal8|Mxd3|Cidec|Sox9|Hhex|Cebpe|Pou2af1|Arx|Bhlhe41|Birc5|Rxrg|Rxra|Cops5|Trp53inp1|Creb3l3|Lbh|Wdr61|Hint1|Btk	http://amigo.geneontology.org/amigo/term/GO:0006355
transcription, DNA-dependent	Gene Ontology	GO:0006351	45	1759	1	1	Rxrg|Fezf2|Ppara|Apex1|Zbtb42|Chaf1b|Vgll3|Usp22|Asf1b|Etv1|Klf11|2700060E02Rik|Irf7|Lhx6|Creb3l3|Tsc22d1|Klf10|Irf8|Lmx1a|Maff|Klf6|Mad2l2|Vdr|Sox8|Sox9|Ebf2|Bnc1|Myrf|Tceal8|Mxd3|Cidec|Hhex|Cebpe|Pou2af1|Arx|Bhlhe41|Birc5|Irf4|Rxra|Trp53inp1|Il33|Lbh|Wdr61|Hint1|Btk	http://amigo.geneontology.org/amigo/term/GO:0006351
