# Supplementary material for: An integrated analysis of lncRNA and mRNA expression profiles in the kidneys of mice with lupus nephritis
Source: PeerJ. 2021 Feb 16;9:e10668. doi: 10.7717/peerj.10668 (PMC7894116; doi:10.7717/peerj.10668)
Supplement: Supplemental Information 6 [file peerj-09-10668-s006.xlsx]

## Sheet: Sheet1
Table S6. List of inflammtory factors, SLE-associated genes and overlapped genes (related to Fig. 5F)
inflammtory factors	SLE-associated genes	Overlapped genes
Fas	Actn3	C1qa
Sbspon	C8a	C1qb
C8a	C4b	C1ra
Oas2	Hist1h2bk	C2
Oas1b	H2-Ea-ps	C3
Vpreb1	C1qb	C8a
Il17f	C1qa	C8g
Ido1	H2-Eb1	Cd86
S100a7a	C8g	Fcgr1
Plp1	C3	H2-Aa
Il17re	C2	H2-Ab1
Mep1b	C7	H2-DMa
Mx2	C6	H2-DMb1
Masp2	H2-Oa	H2-Eb1
Il31ra	H2-DMa	Hc
Exo1	H2-Aa
Dclre1c	Hist1h2ap
Ptpn22	Cd86
Tnfaip8l2	H2-DMb2
Cfb	H2-DMb1
Masp1	Hist1h2ai
C1qb	Hc
Fcna	Hist1h2af
Tlr13	Hist1h2ab
Psmb9	H2-Ab1
Psmb8	C1ra
Lgals3	Hist1h3b
Iigp1	Hist1h3g
Cd74	Hist1h3i
Clec4n	Fcgr1
H2-K1
Cd300a
Irf7
Btk
Olr1
Tnfrsf13b
H2-T23
Lat2
H2-Q10
C1qa
AF251705
Cd300lf
B2m
Cd7
H2-Eb1
C8g
C3
Hc
Rnf125
Irgm1
Klrg1
H2-Q7
Cd300lh
Tap1
Ltf
H2-D1
S100a8
Lcn2
H2-DMa
Amica1
H2-Aa
Clec4a2
Oasl1
H2-DMb1
S100a9
Prg2
C2
Cd300lb
Cd86
Hfe
Axl
Pdcd1
Lbp
Clec5a
C1s1
Cd1d1
Cfh
Cfi
C1rb
H2-Ab1
Cfd
C1ra
Msrb1
Cd14
Tlr2
Kcnn4
Tlr6
Tlr7
Clec7a
Unc93b1
Tlr8
Tlr9
Hp
Fcgr1
Ly86
Cxcl1
Il18
Nos2
Cxcl5
Cd163
Ackr1
Adam8
Pla2g7
Ptafr
Selp
Mapkapk2
P2rx7
Ccl11
Ephx2
Tnfrsf1b
Ccl22
Sdc1
Alox5
Slc11a1
Il1f6
Cela1
Ccl2
Lipa
Ccl5
Ccl8
Vnn1
F2r
Ccr2
Ccr3
Cxcr6
Agtr2
Chil3
Cnr2
Crlf2
Cyba
Cxcl11
Cxcl13
Ccl24
Was
Irf8
Fcgrt
Ccl6
Ccl9
Ifi44l
Bmp6
Enpp2
Ccl28
Tnfsf13b
Trim31
Trim59
Cybb
